# Supplementary material for: Exploratory Analysis of TP53 Mutations in Circulating Tumour DNA as Biomarkers of Treatment Response for Patients with Relapsed High-Grade Serous Ovarian Carcinoma: A Retrospective Study
Source: PubMed Central journal article supplement (PMC5172526; doi:10.1371/journal.pmed.1002198), 2016-12-20

## S3 Fig. Graphs of TP53MAF and CA-125 changes by patient.

### Table of Contents

|          |    |
|----------|----|
| OV04-21  | 2  |
| OV04-30  | 3  |
| OV04-33  | 4  |
| OV04-36  | 5  |
| OV04-39  | 6  |
| OV04-47  | 7  |
| OV04-49  | 8  |
| OV04-52  | 9  |
| OV04-57  | 10 |
| OV04-63  | 11 |
| OV04-64  | 12 |
| OV04-65  | 13 |
| OV04-68  | 14 |
| OV04-70  | 15 |
| OV04-72  | 16 |
| OV04-73  | 17 |
| OV04-74  | 18 |
| OV04-75  | 19 |
| OV04-76  | 20 |
| OV04-79  | 21 |
| OV04-81  | 22 |
| OV04-90  | 23 |
| OV04-95  | 24 |
| OV04-97  | 25 |
| OV04-98  | 26 |
| OV04-102 | 27 |
| OV04-105 | 28 |
| OV04-112 | 29 |
| OV04-114 | 30 |
| OV04-116 | 31 |
| OV04-127 | 32 |
| OV04-129 | 33 |
| OV04-133 | 34 |
| OV04-135 | 35 |
| OV04-142 | 36 |
| OV04-144 | 37 |
| OV04-145 | 38 |
| OV04-150 | 39 |
| OV04-161 | 40 |
| OV04-200 | 41 |

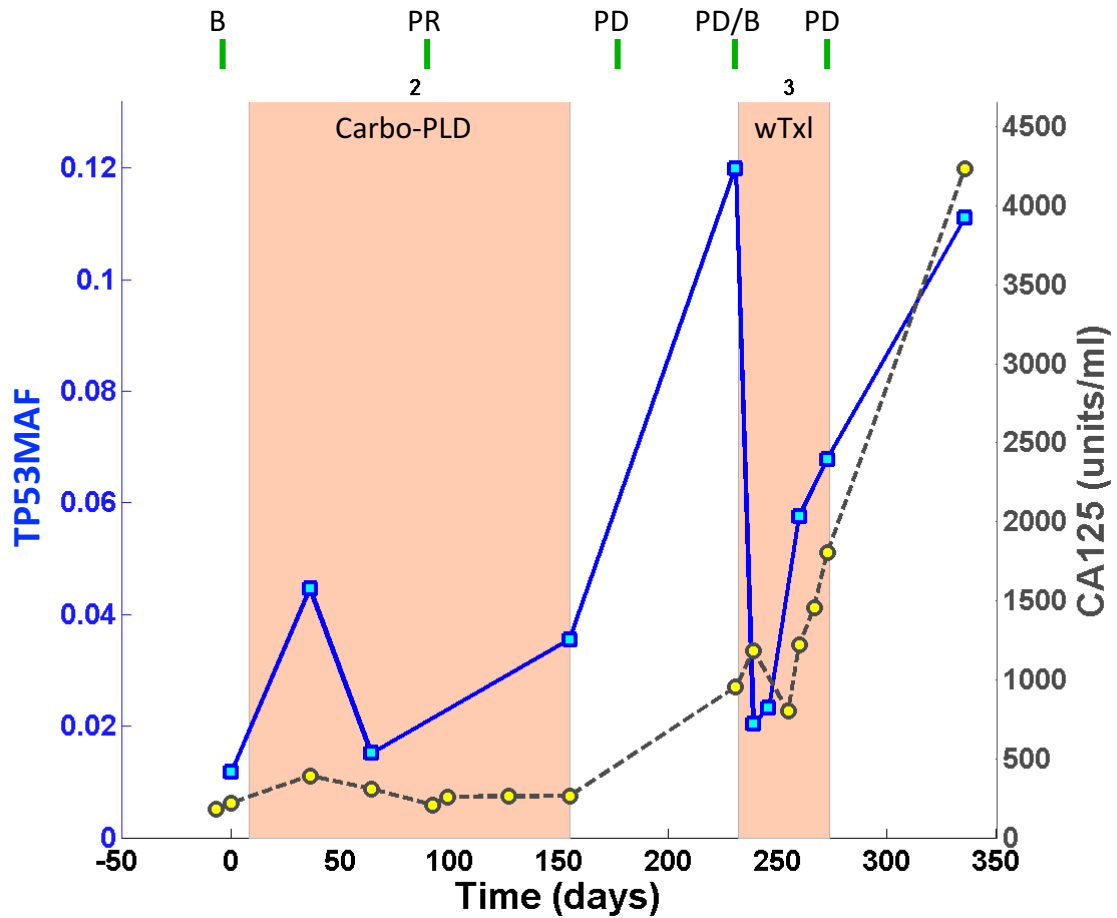

Key:

■—■, ctDNA; ●---●, CA-125; , course of chemotherapy; |, CT scan; |, clinical progression; ▼, ascitic or pleural drain. Number above the orange block refers to the course (line) of treatment. B, baseline CT; CR, complete response on CT; PR, partial response on CT; PD, progressive disease on CT; SD, stable disease on CT. Carbo, carboplatin; Carbo-Txl, carboplatin and paclitaxel; Cis-PLD, cisplatin and liposomal doxorubicin ECX, epirubicin, cisplatin and capecitabine; Gem, gemcitabine; PLD, pegylated liposomal doxorubicin; wTxI, weekly paclitaxel; xTxI+/-sara, weekly paclitaxel +/- saracatinib (on SaPPrOC trial); Topo, topotecan; RT, radiotherapy

OV04-30

Stage at diagnosis: IIIC

Residual disease: no residual

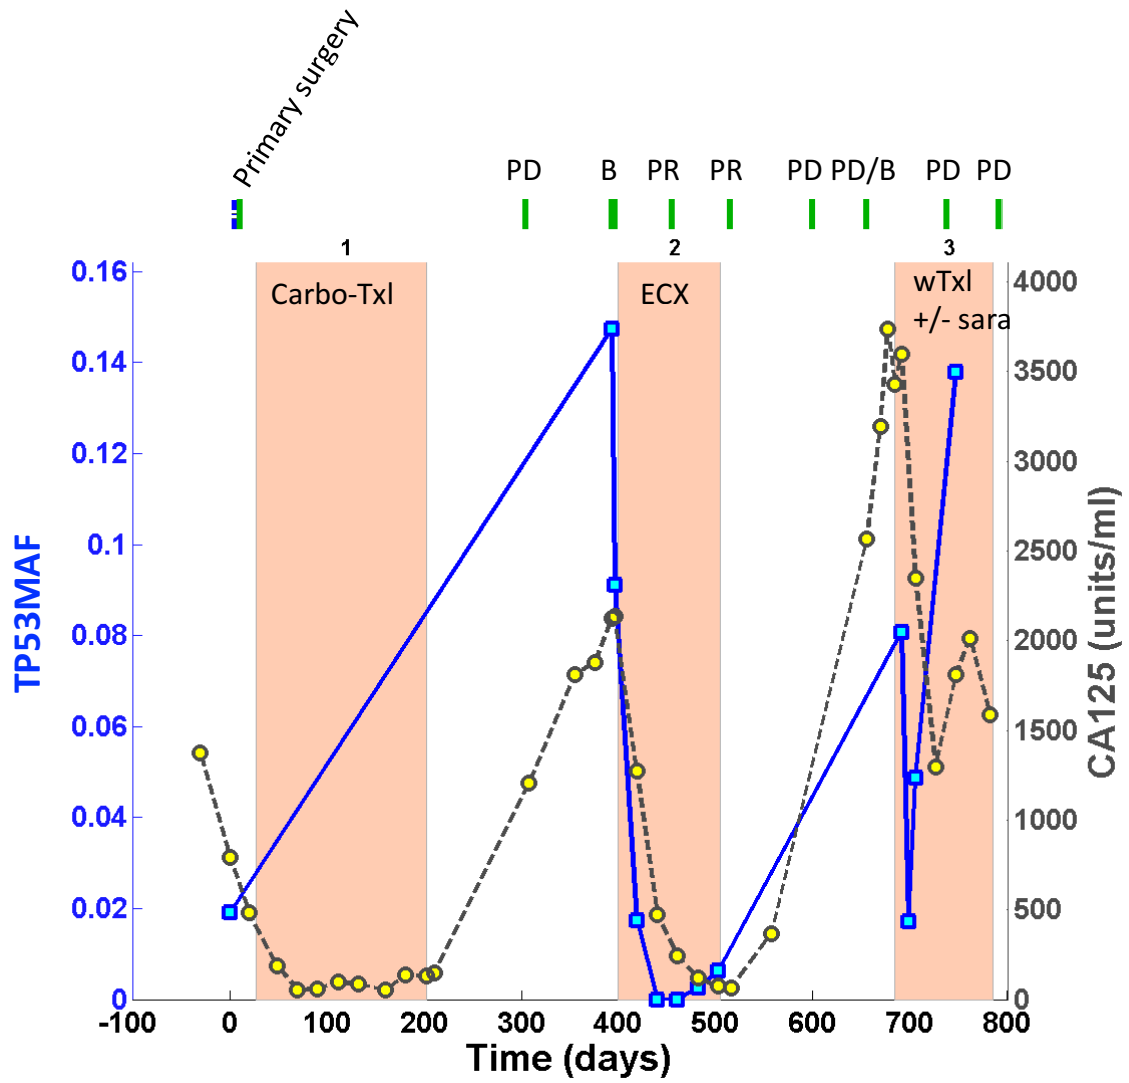

OV04-33

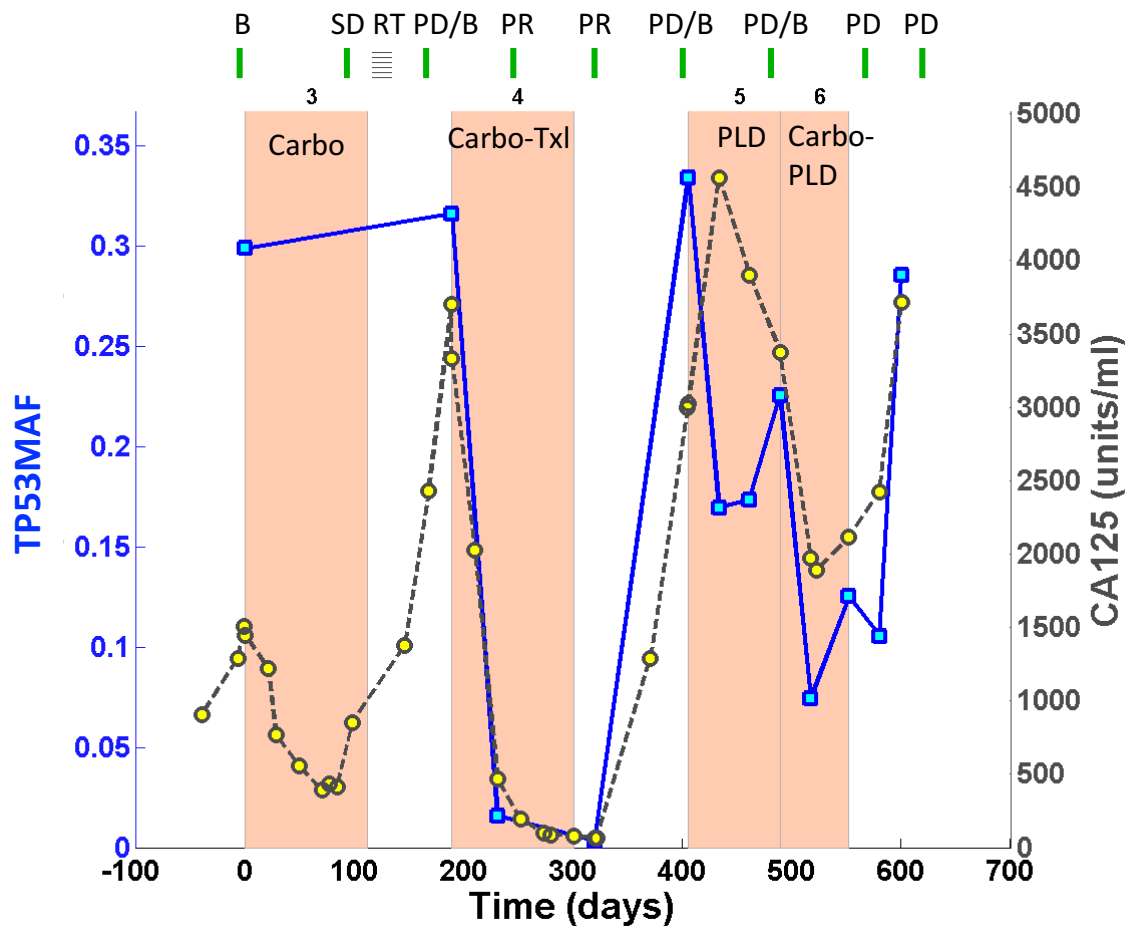

OV04-36

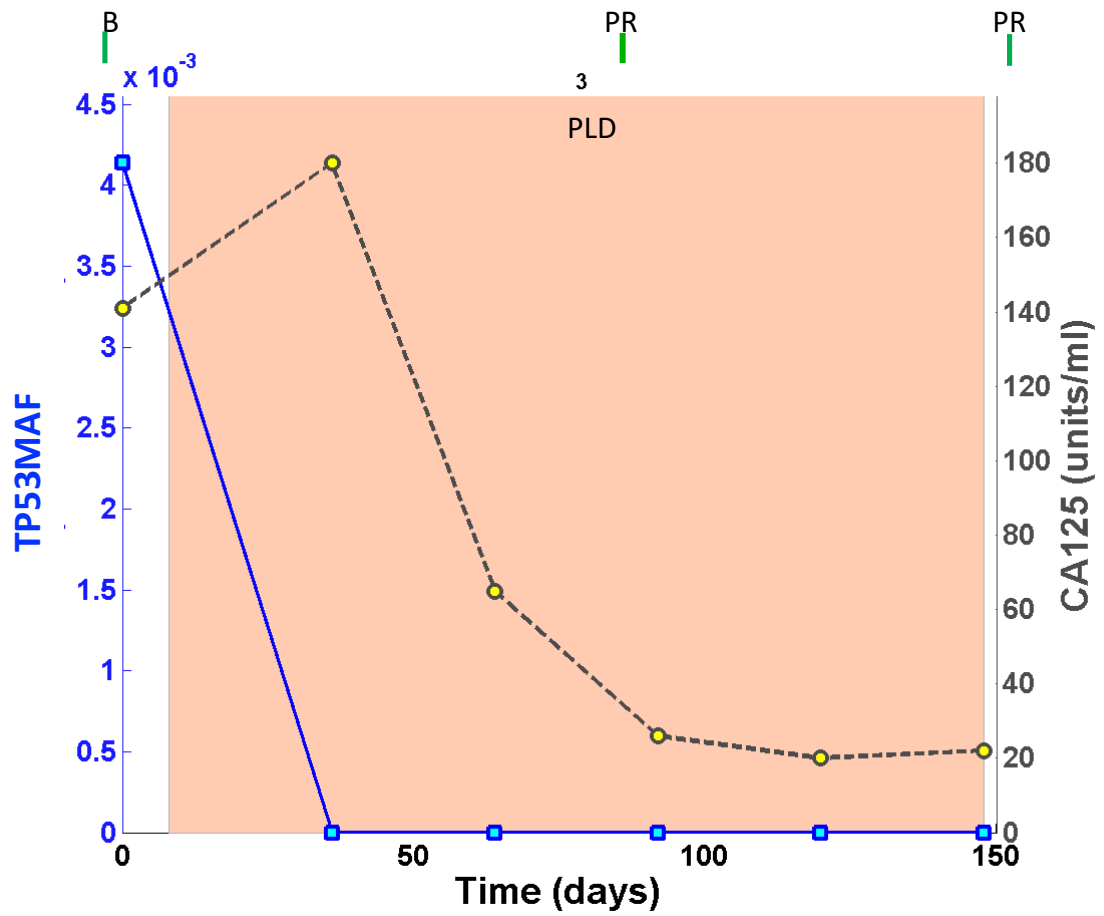

OV04-39

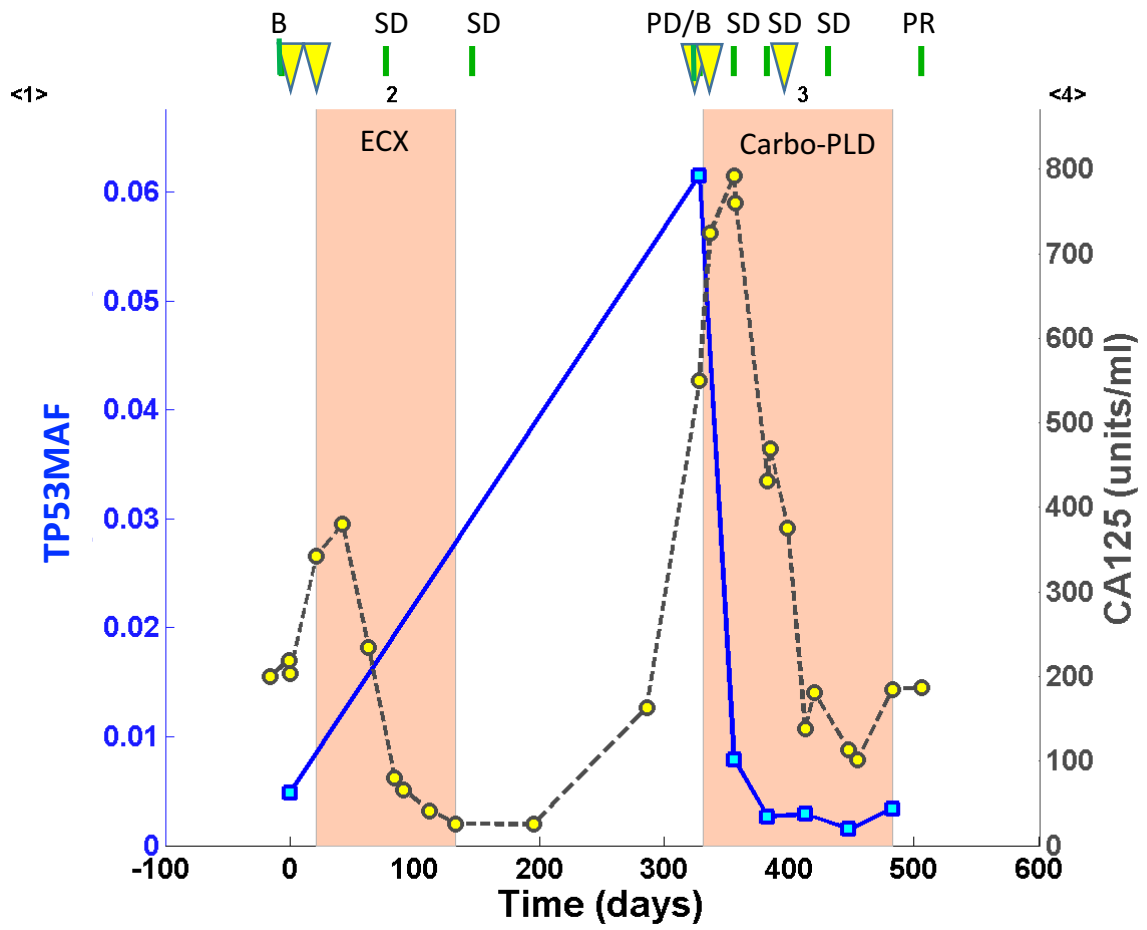

OV04-47

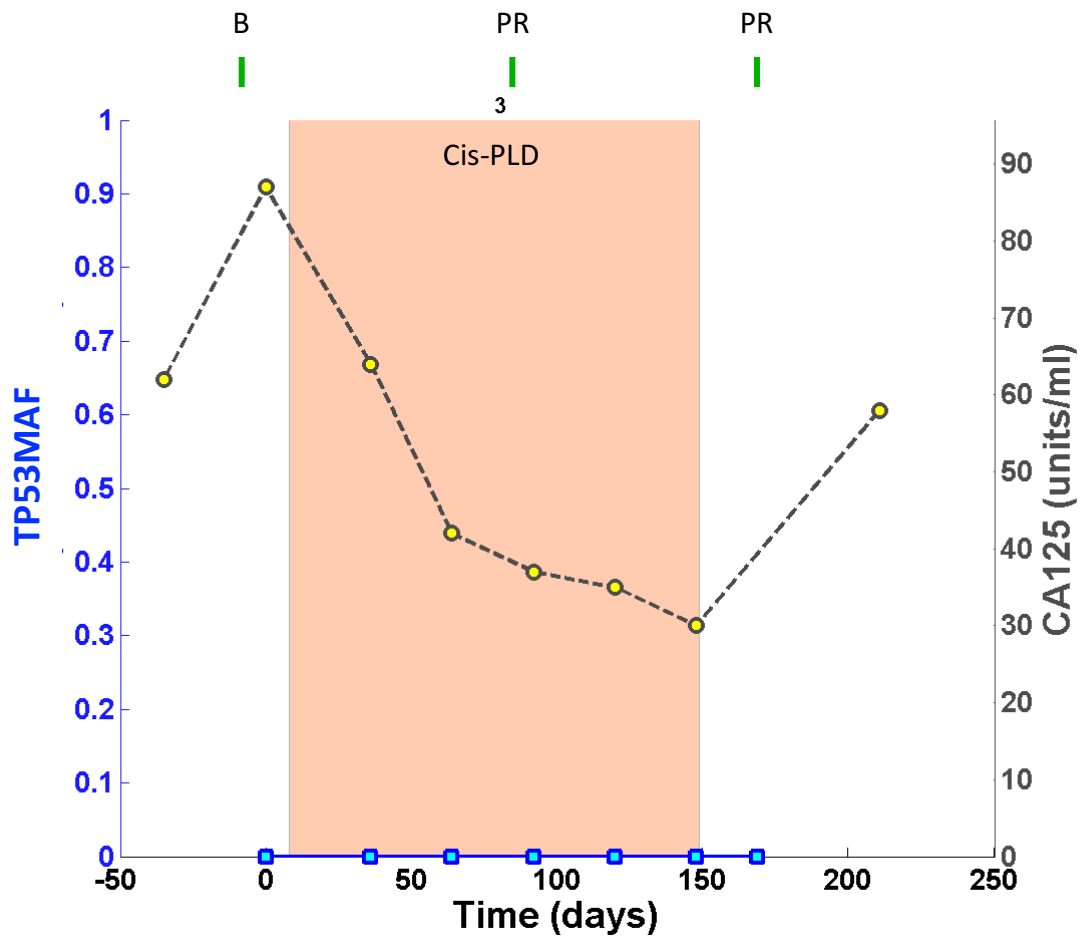

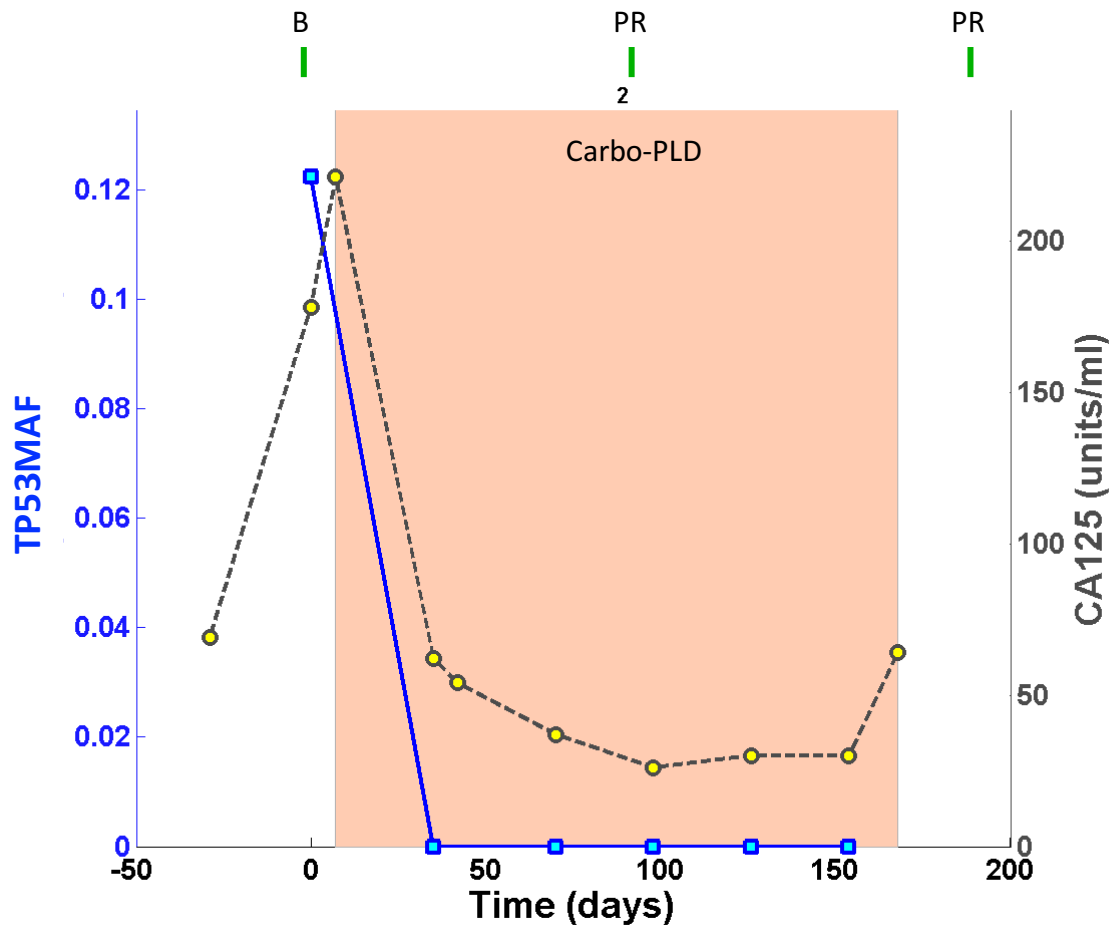



OV04-52

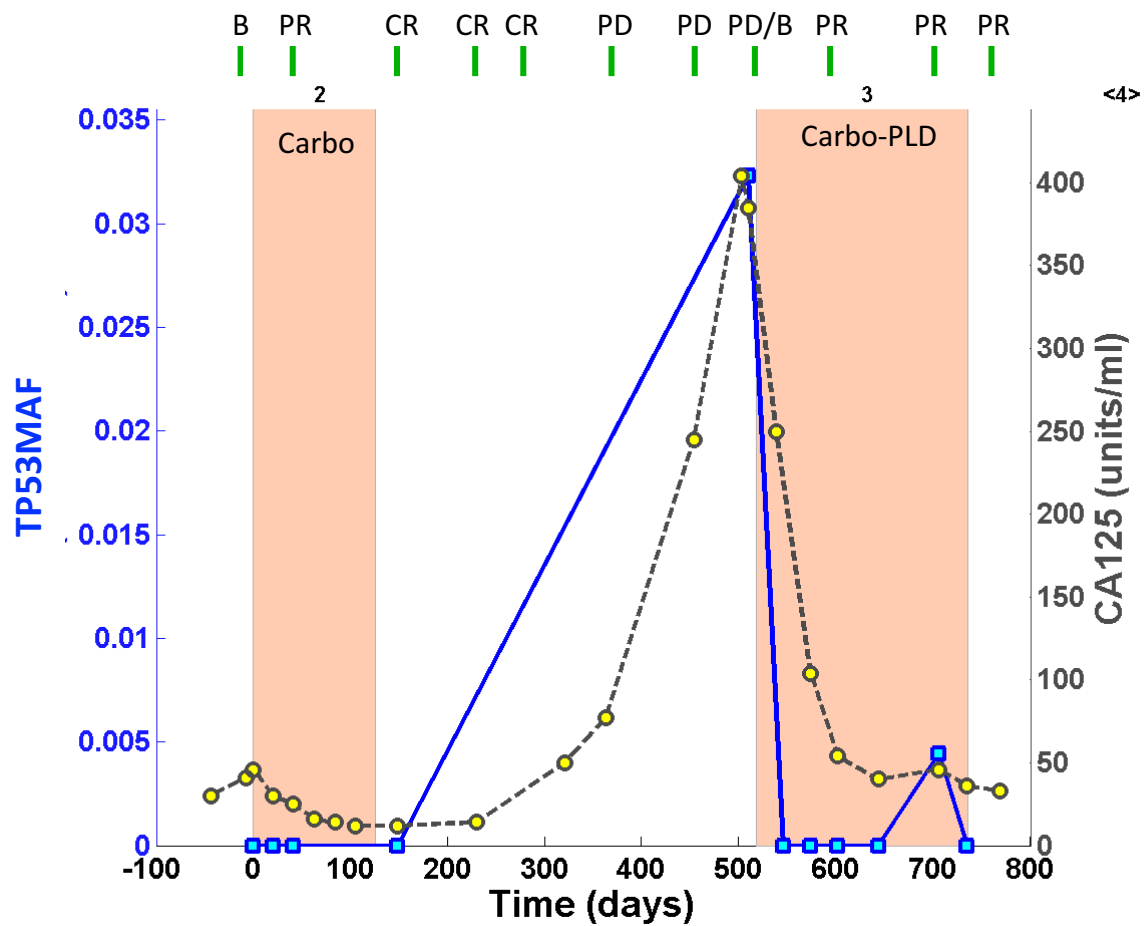

OV04-57

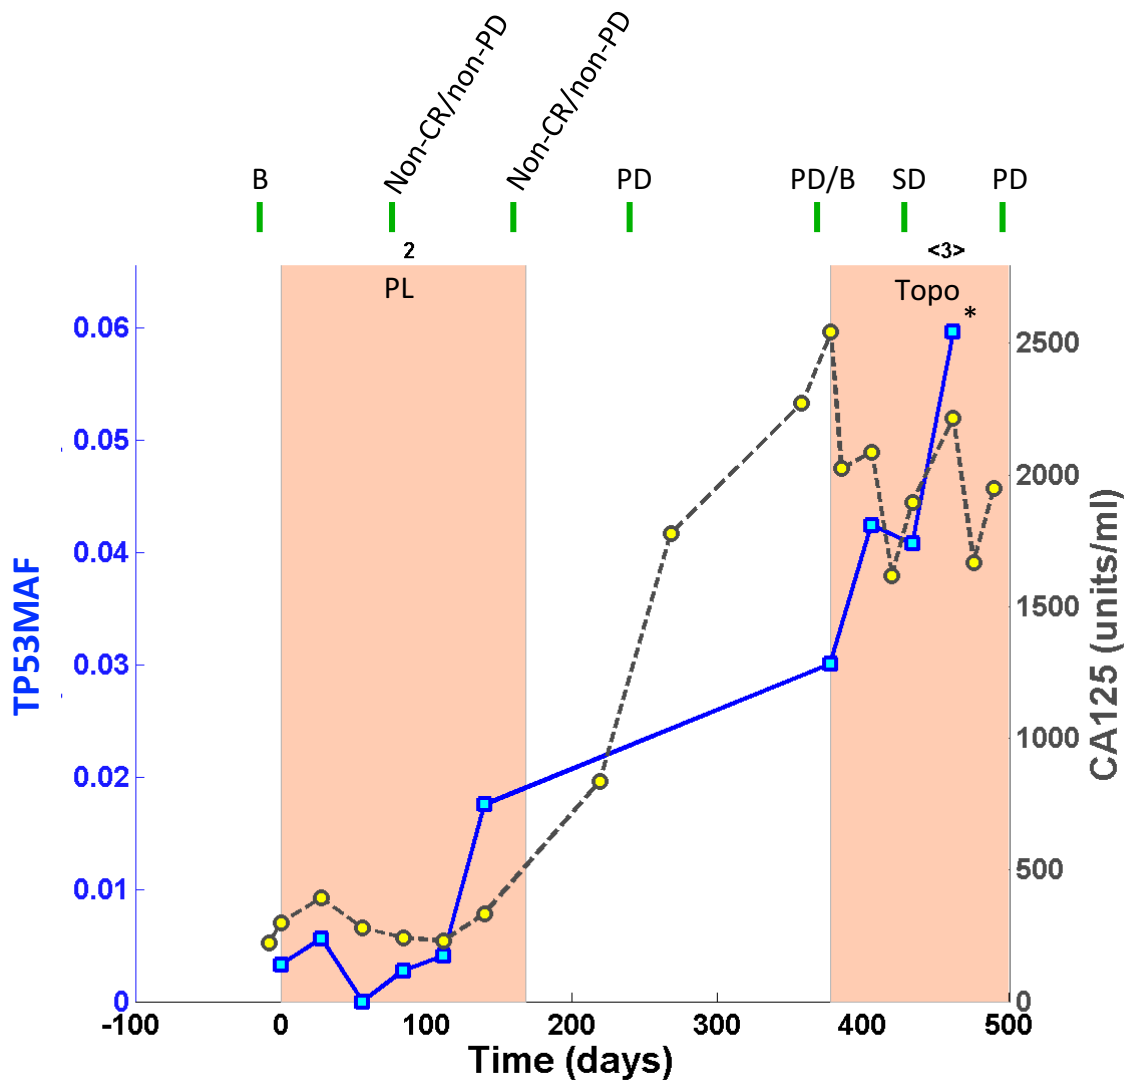

\*new onset of headaches. CT shows new brain metastases (PD)

OV04-63

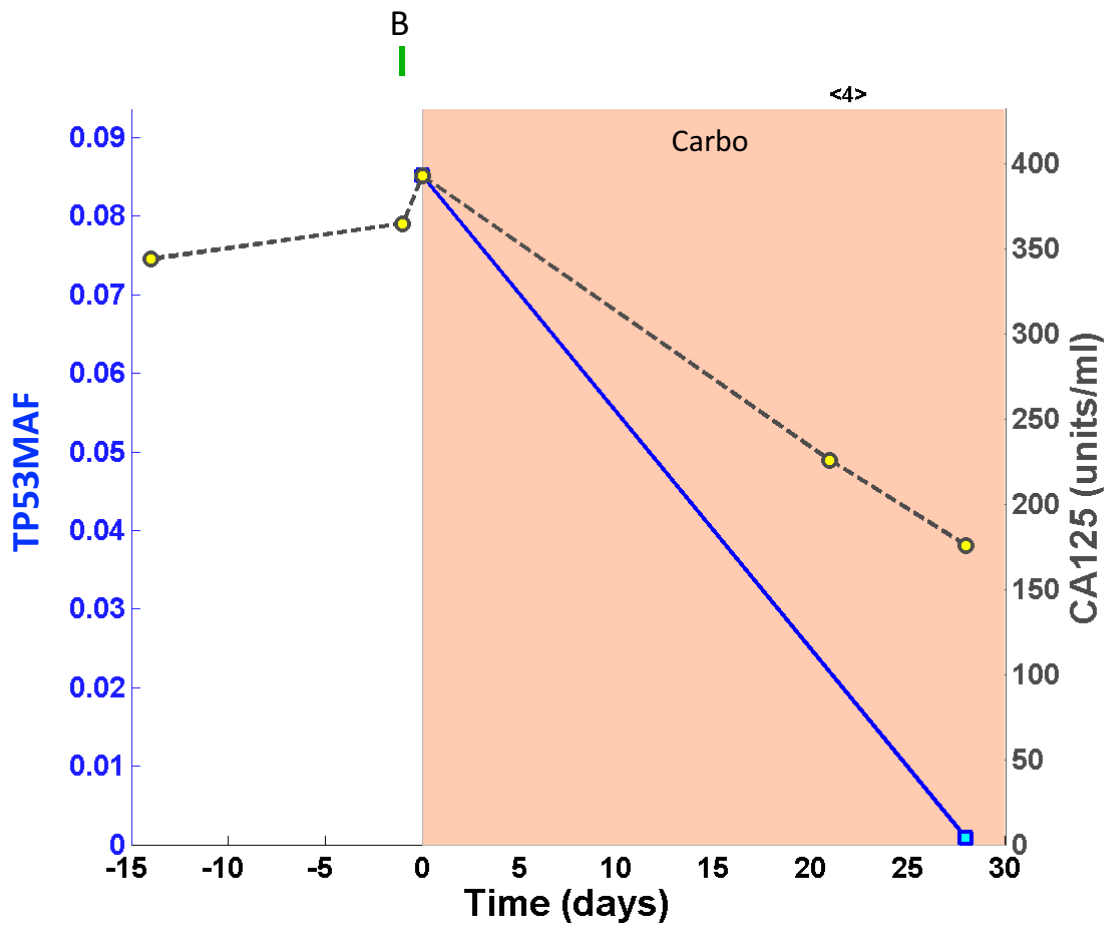

OV04-64

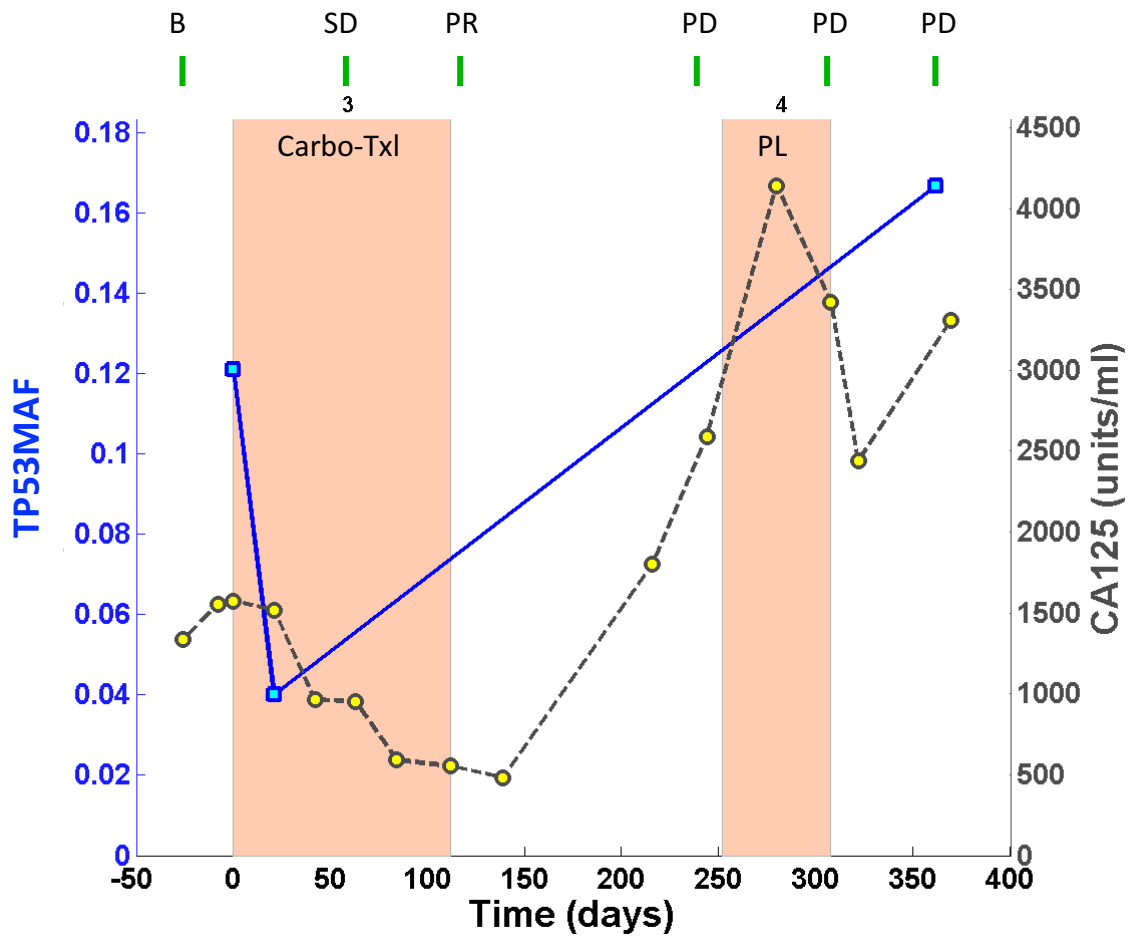

OV04-65

Stage at diagnosis: IV  
Residual disease: no residual

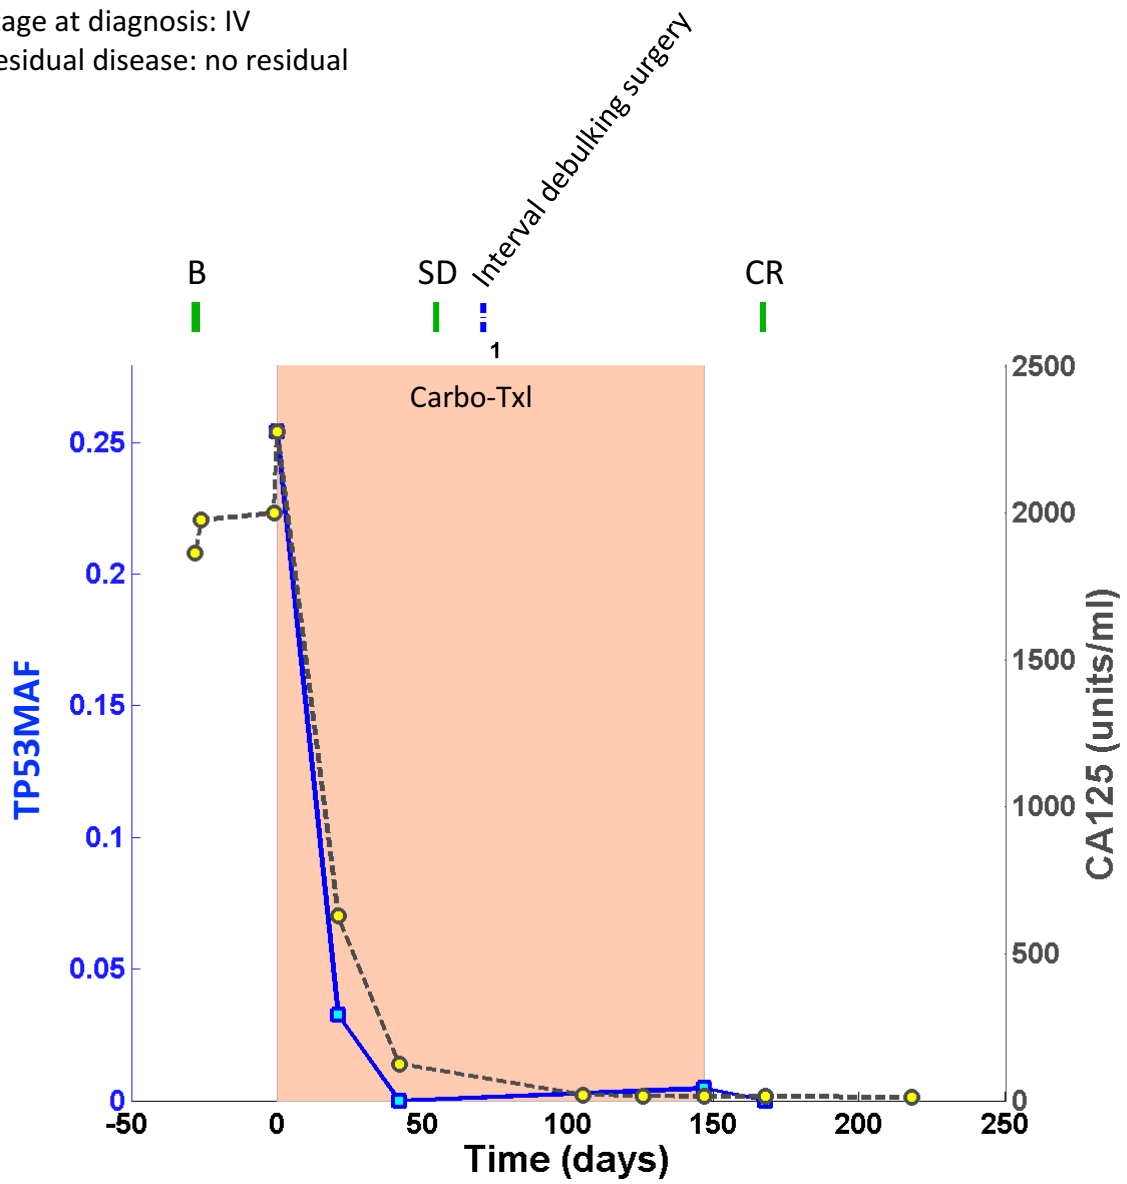

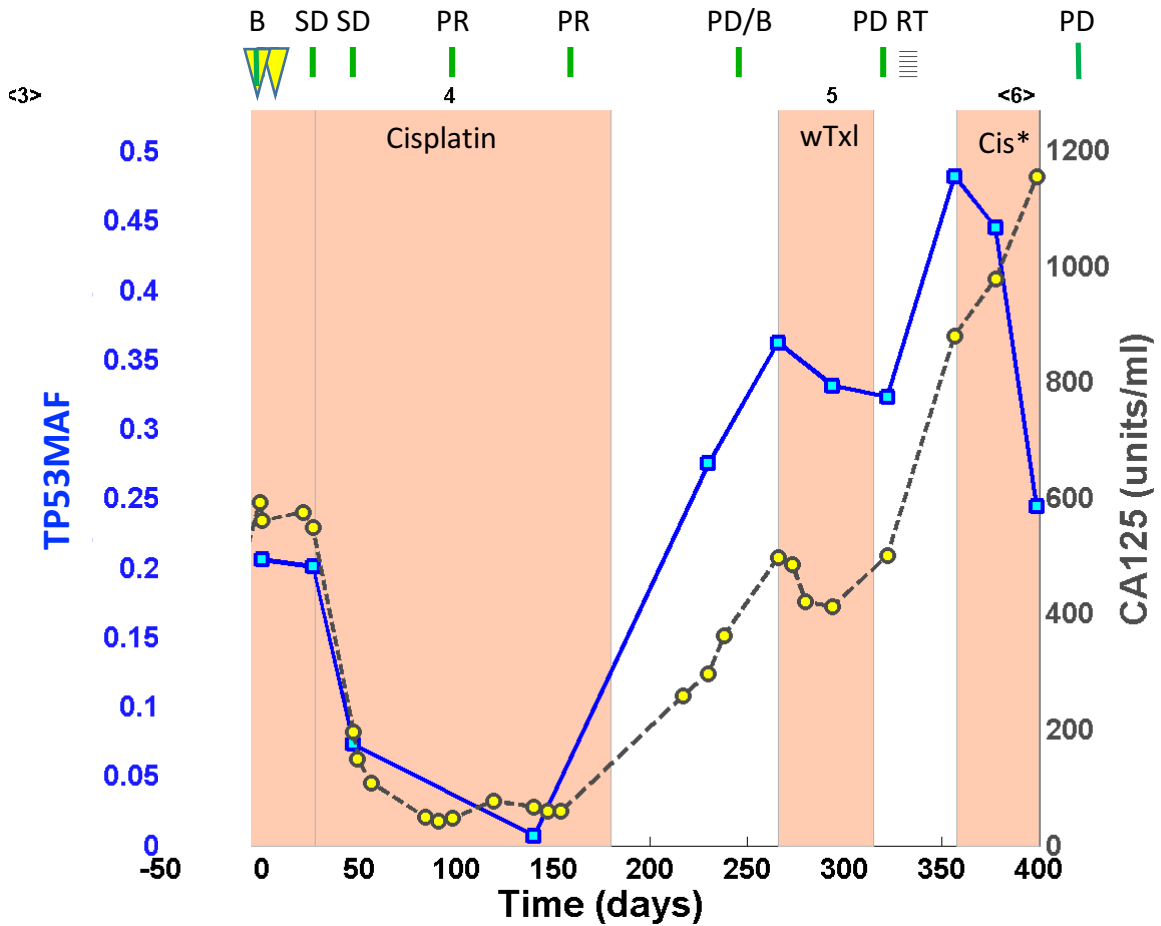

\*This patient had discordant ctDNA and CA-125 on her 6<sup>th</sup> course of treatment. She stopped chemotherapy permanently after 2 cycles of cisplatin, since her CT scan showed progression and her CA-125 was rising (thought ctDNA falling). She was discharged from clinic with best supportive care. She went on to live 238 days (7 months) without any further treatment, indicating that the fall in ctDNA may have been a better predictor of outcome than the CT or CA-125. Of note her pre-treatment CT scan was 5 weeks before the start of treatment, and therefore the re-assessment CT scan carried out 8 weeks after the first cycle of chemotherapy could have overestimated progression on treatment.

OV04-70

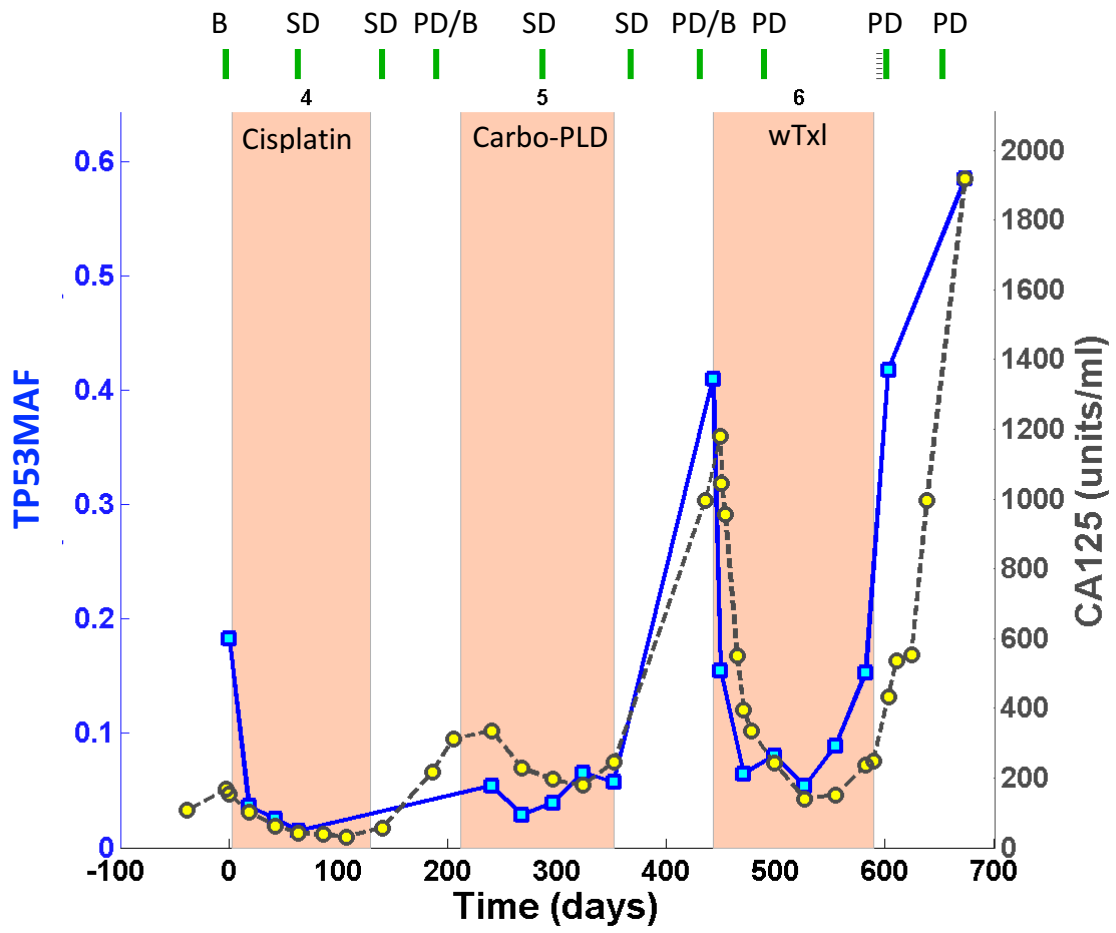

OV04-72

Stage at diagnosis: IV  
Residual disease: no residual

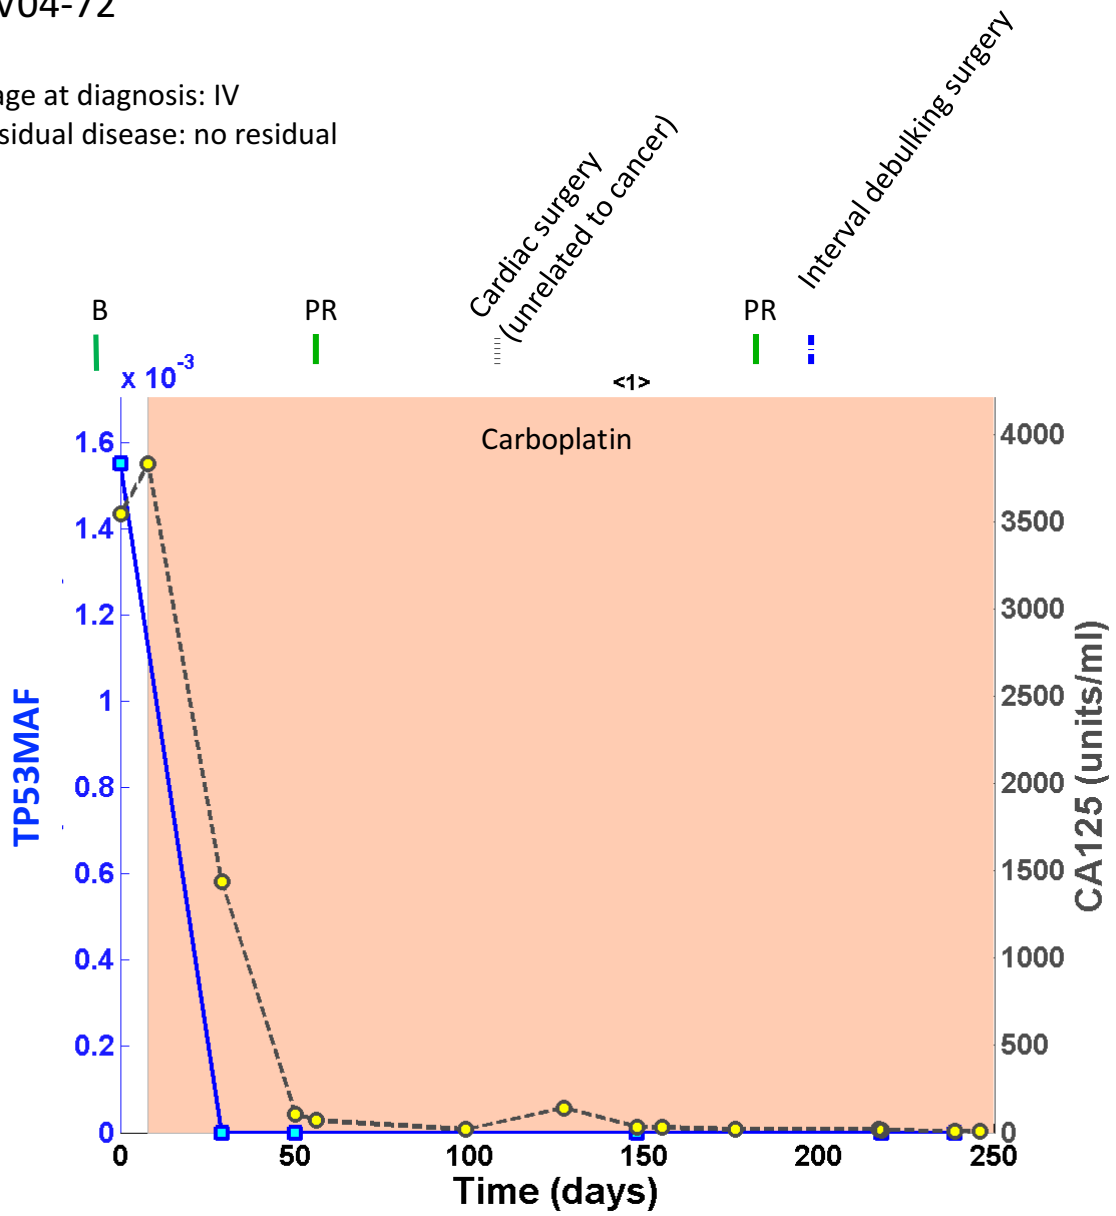



OV04-73

Stage at diagnosis: IIIC

Residual disease: NA (primary chemotherapy)

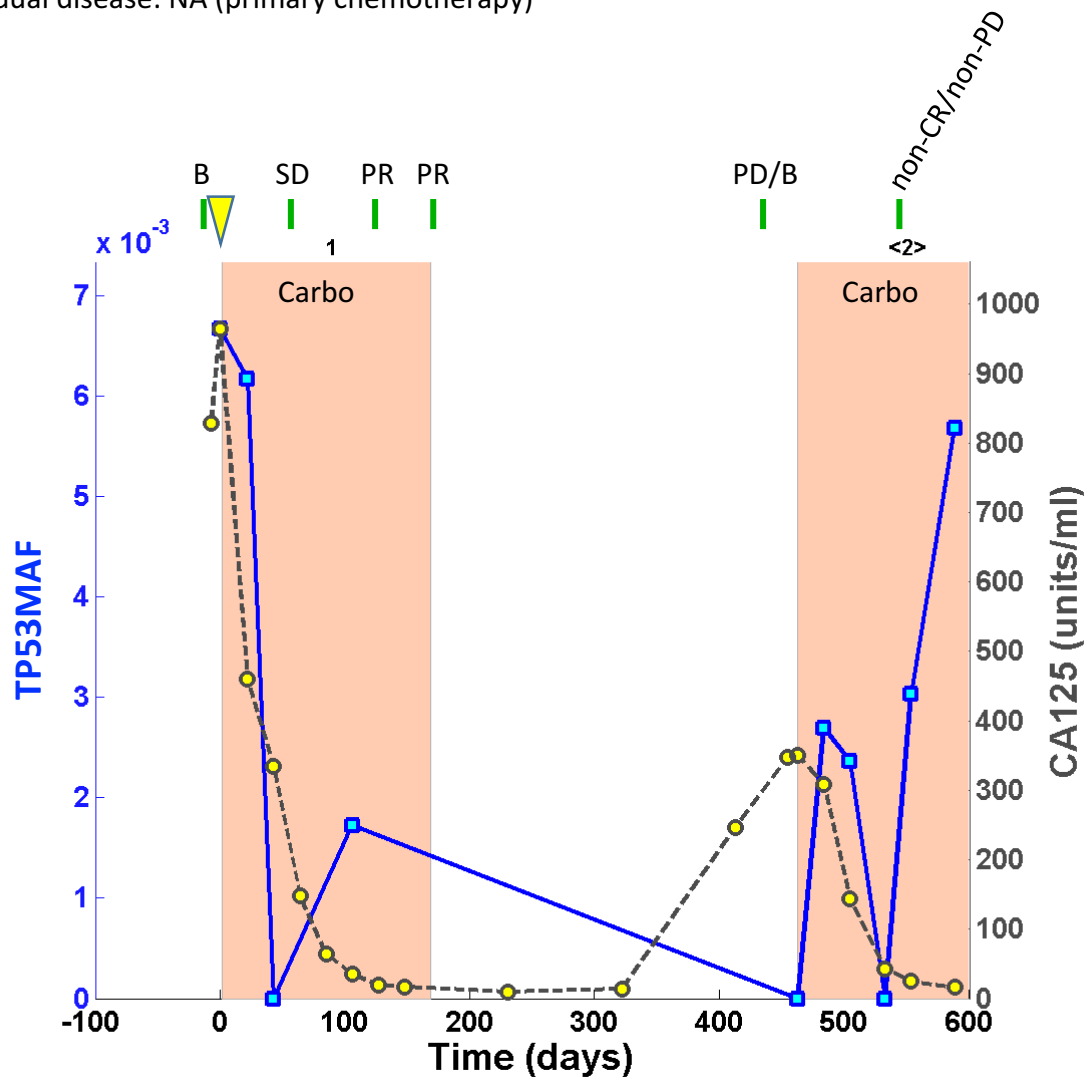

OV04-74

Stage at diagnosis: IIIC  
Residual disease: no residual

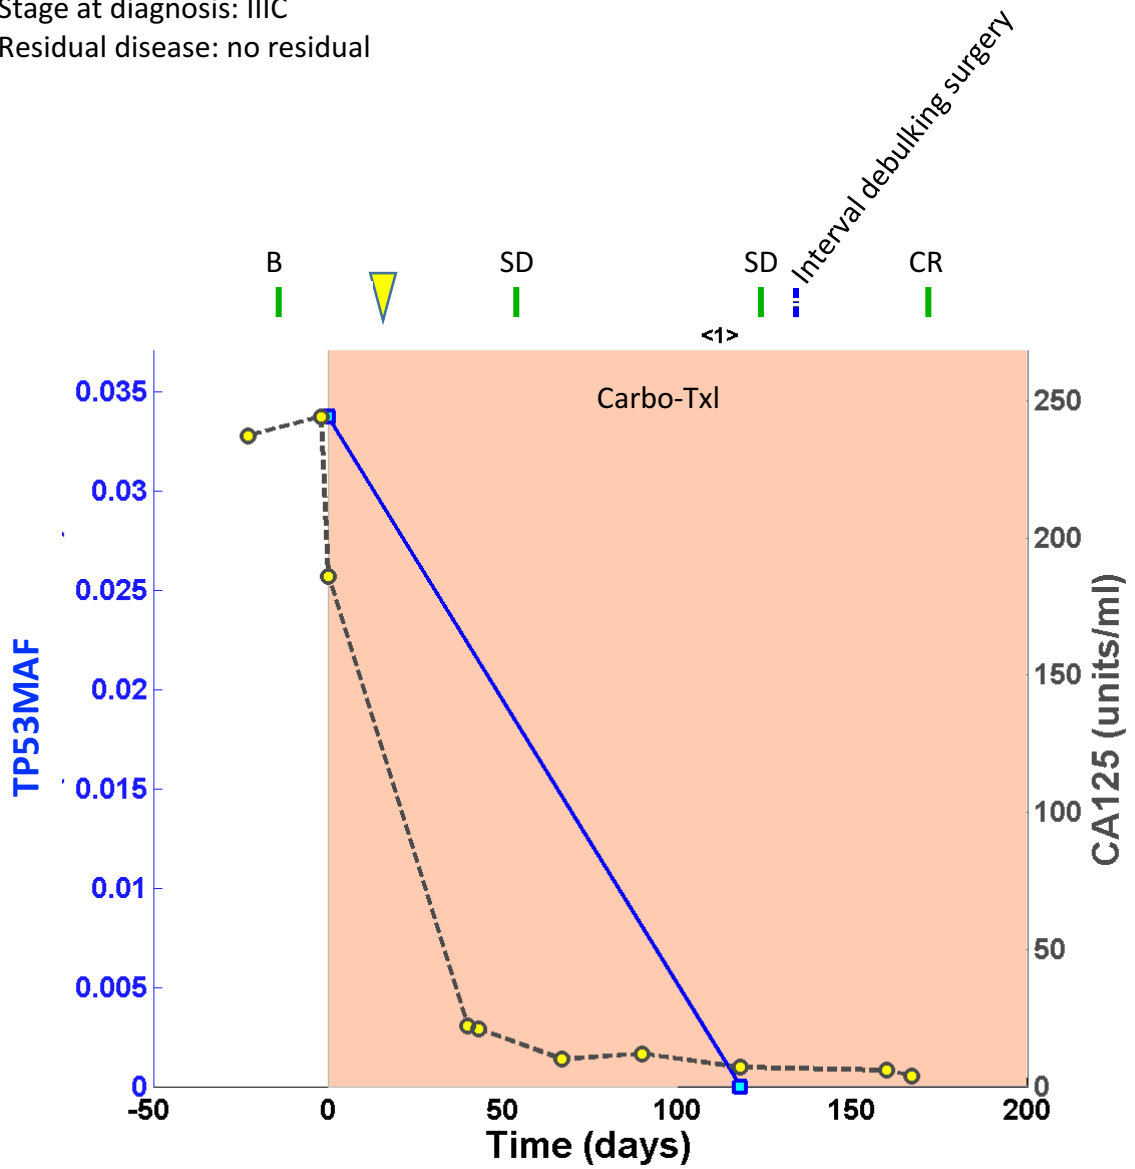

# OV04-75

Stage at diagnosis: IIIC

Residual disease: no residual

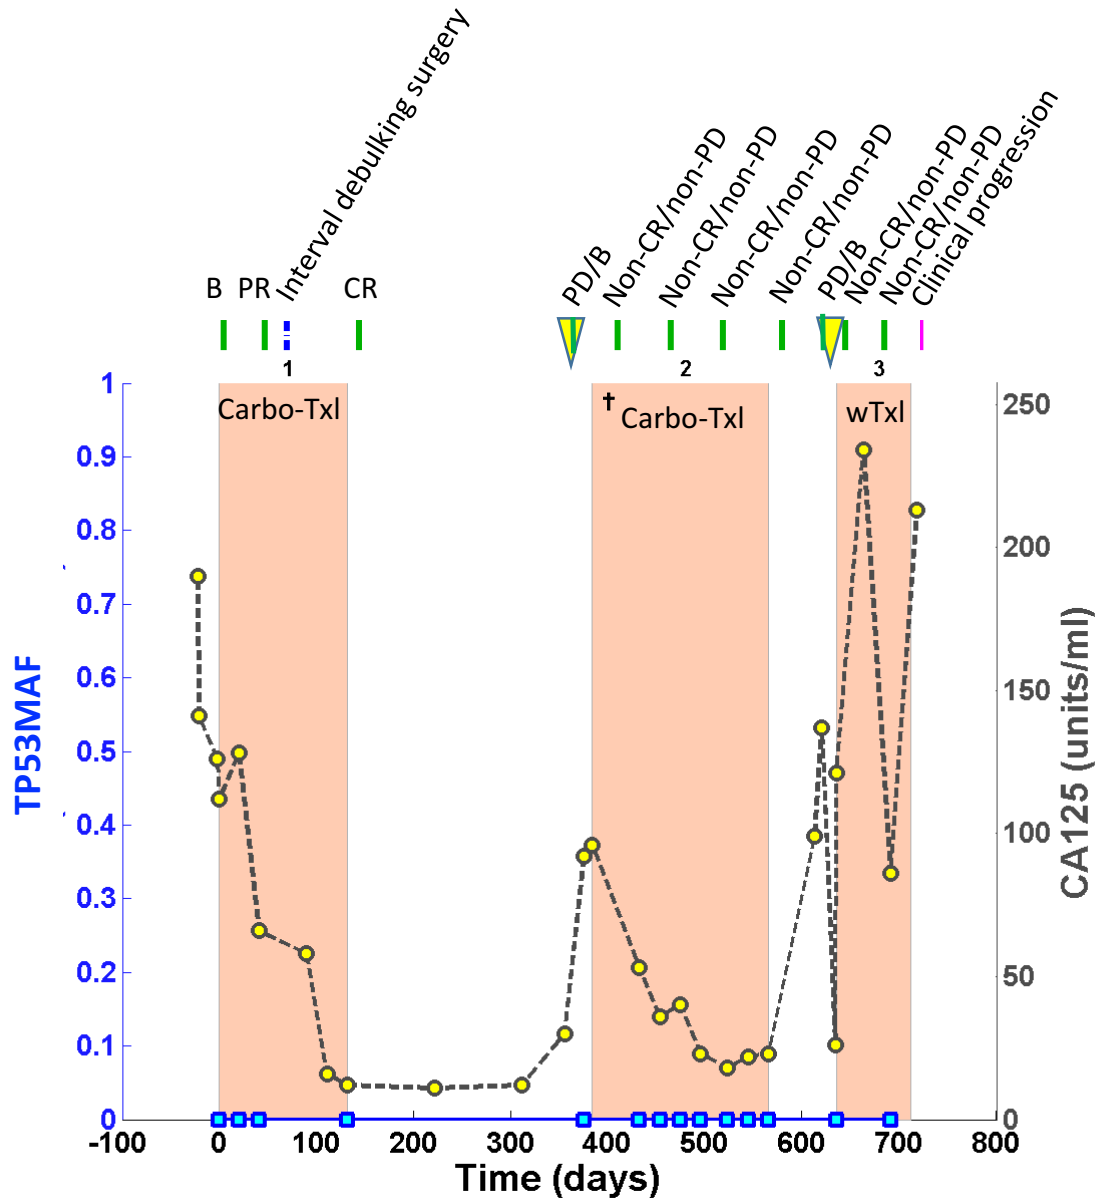

† 1st cycle with Cediranib/placebo on ICON6 trial (Cediranib/placebo stopped due to toxicity).

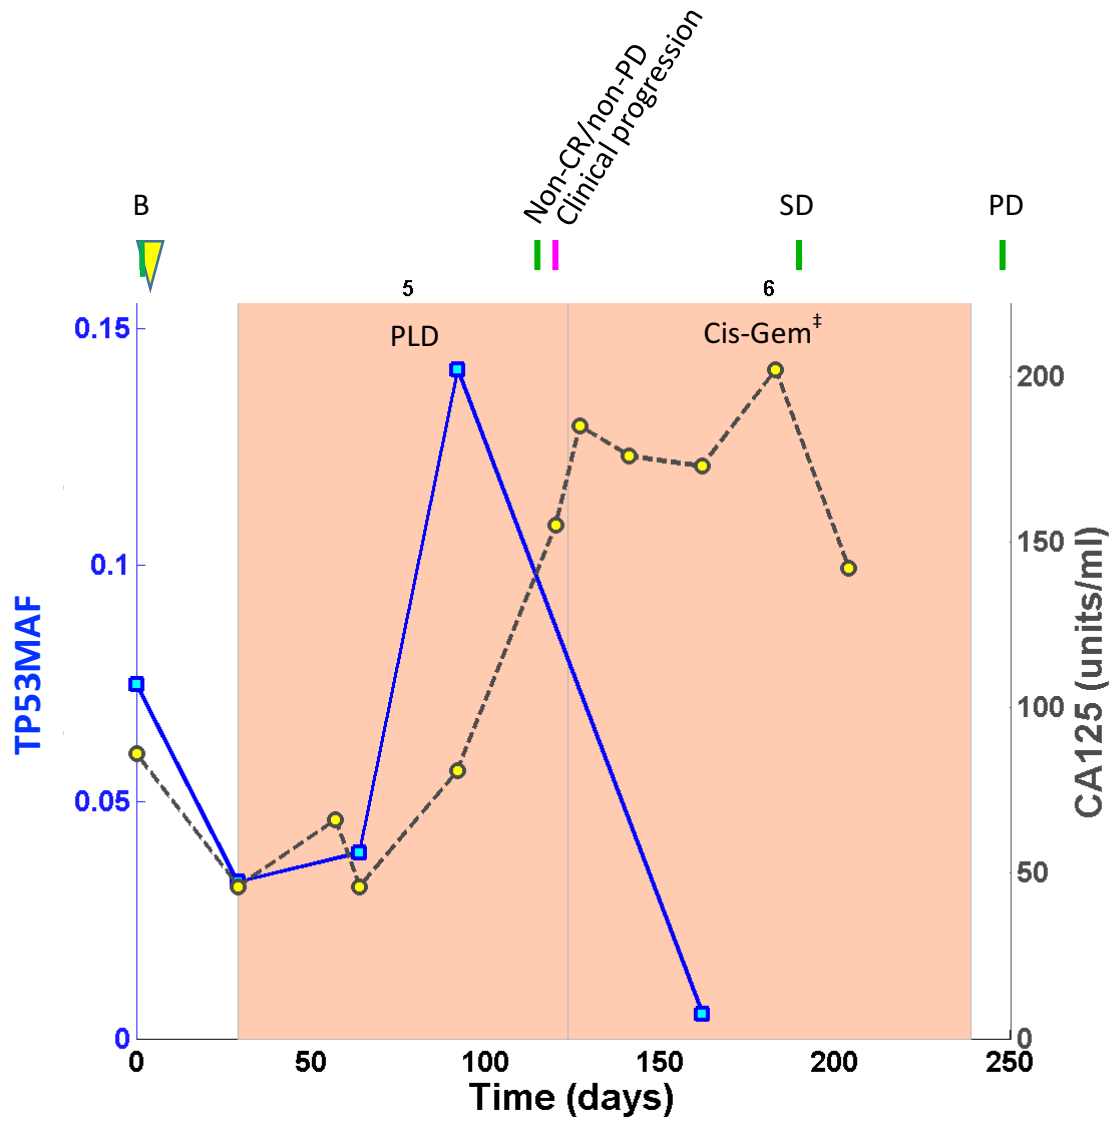

‡ Gemcitabine stopped for last 4 cycles (of total of 6 cycles)

OV04-79

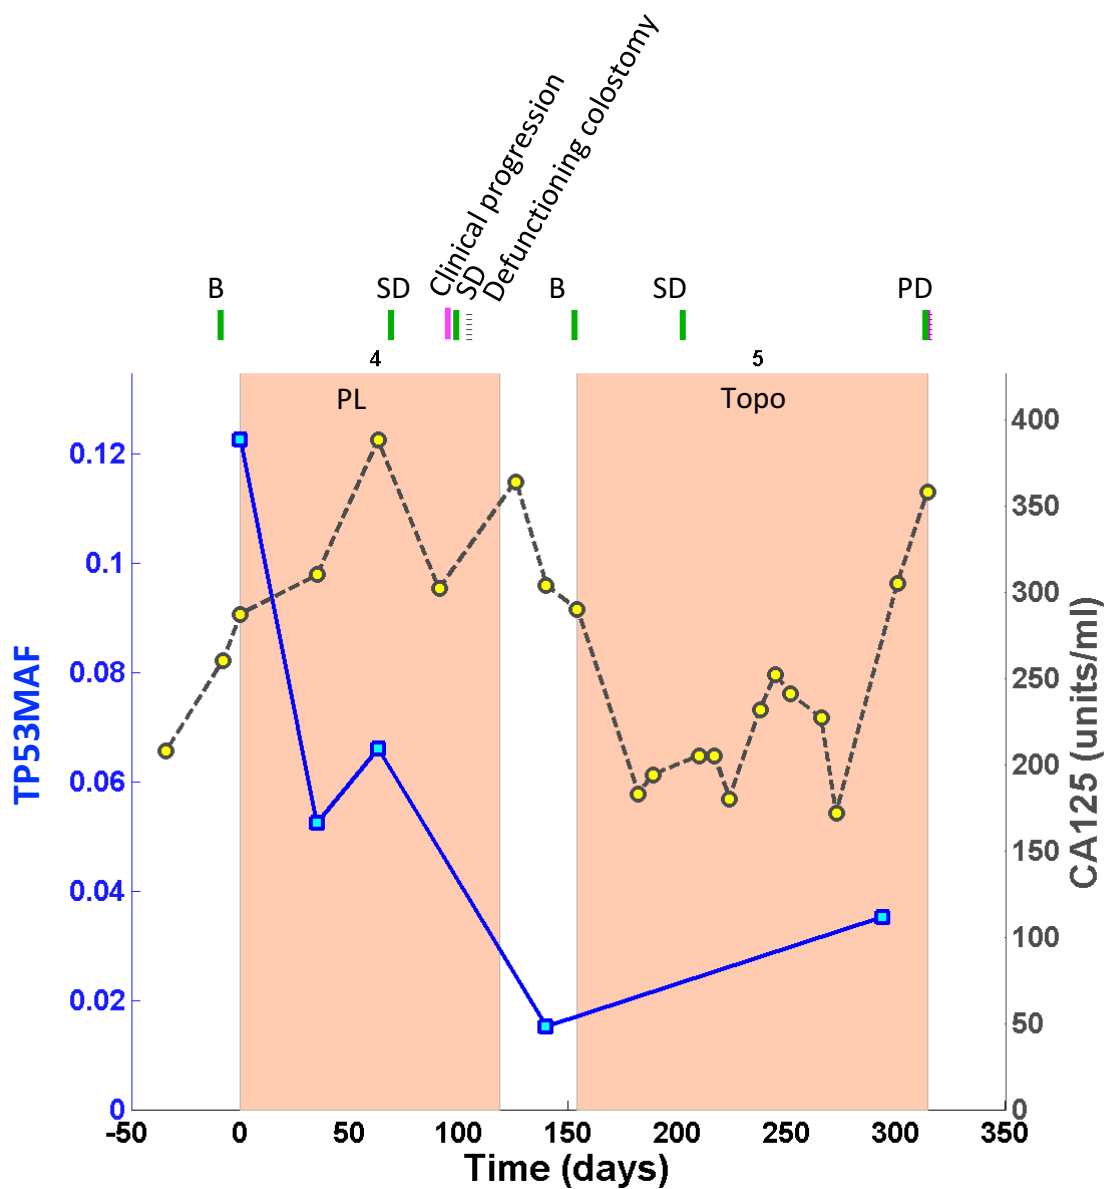

OV04-81

Stage at diagnosis: IIIC  
Residual disease: >1 cm

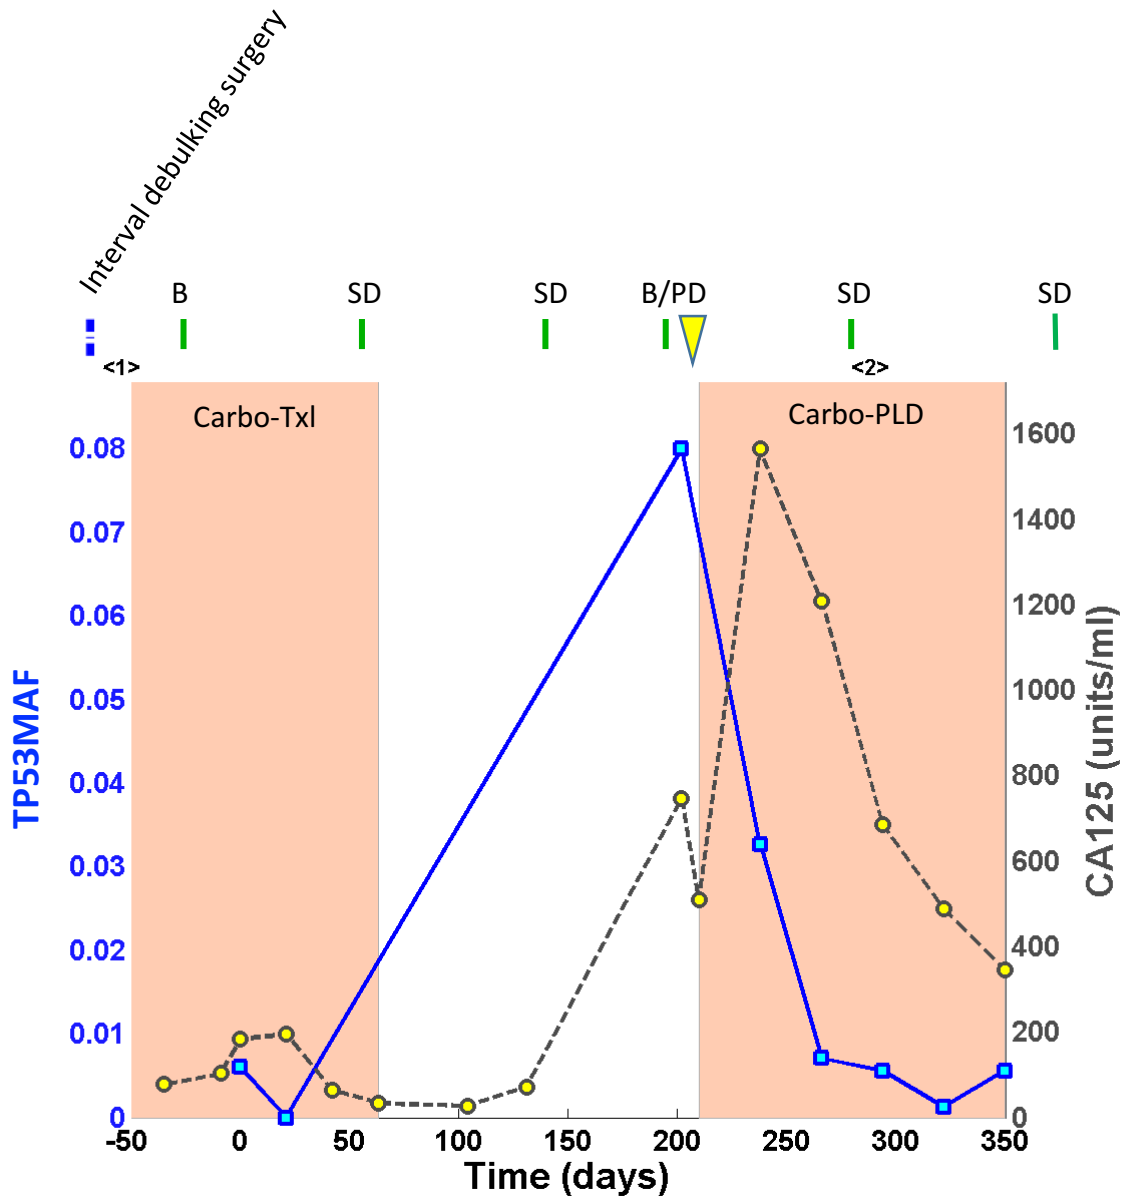

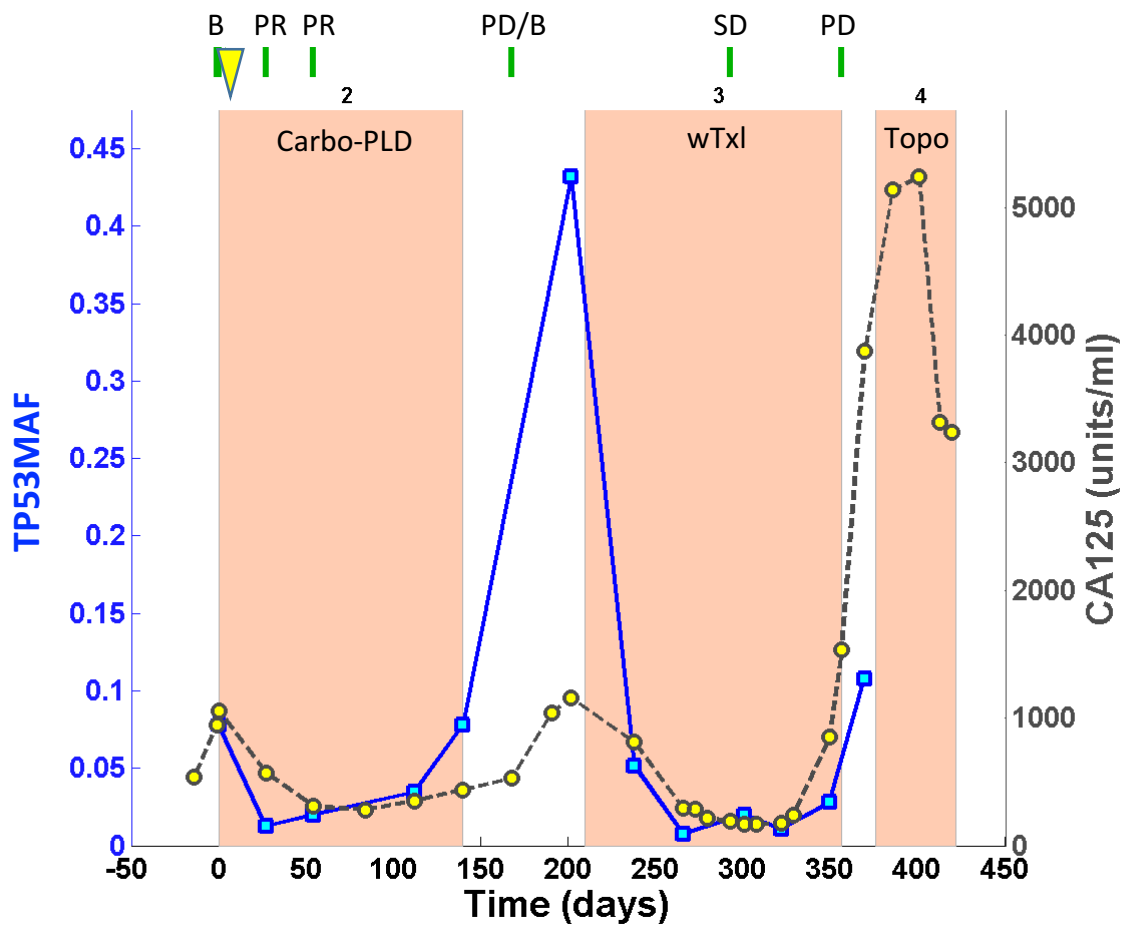

OV04-95

Stage at diagnosis: IC  
Residual disease: no residual

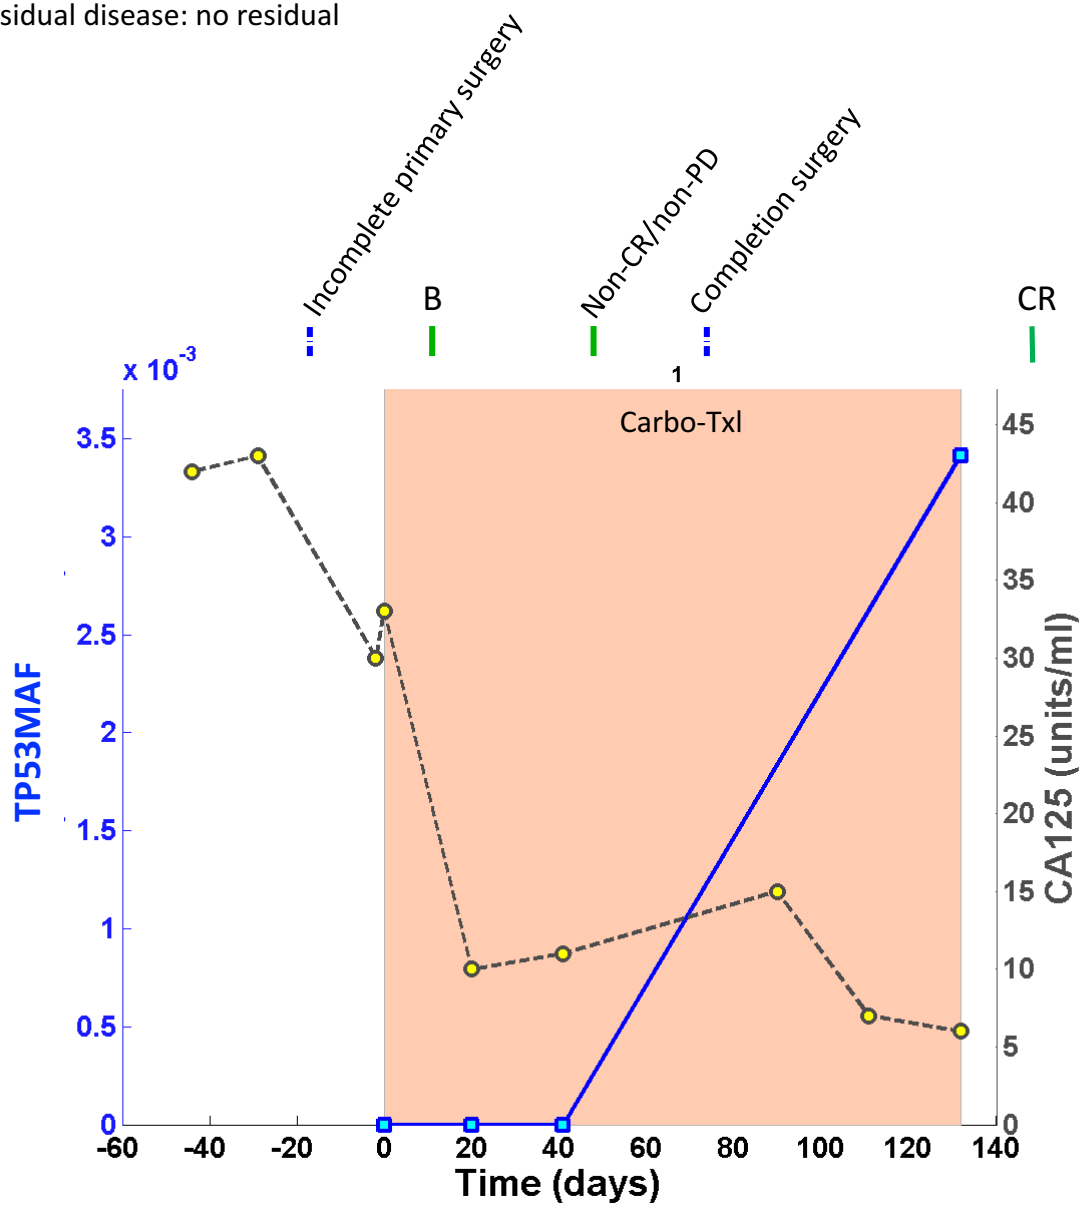



OV04-97

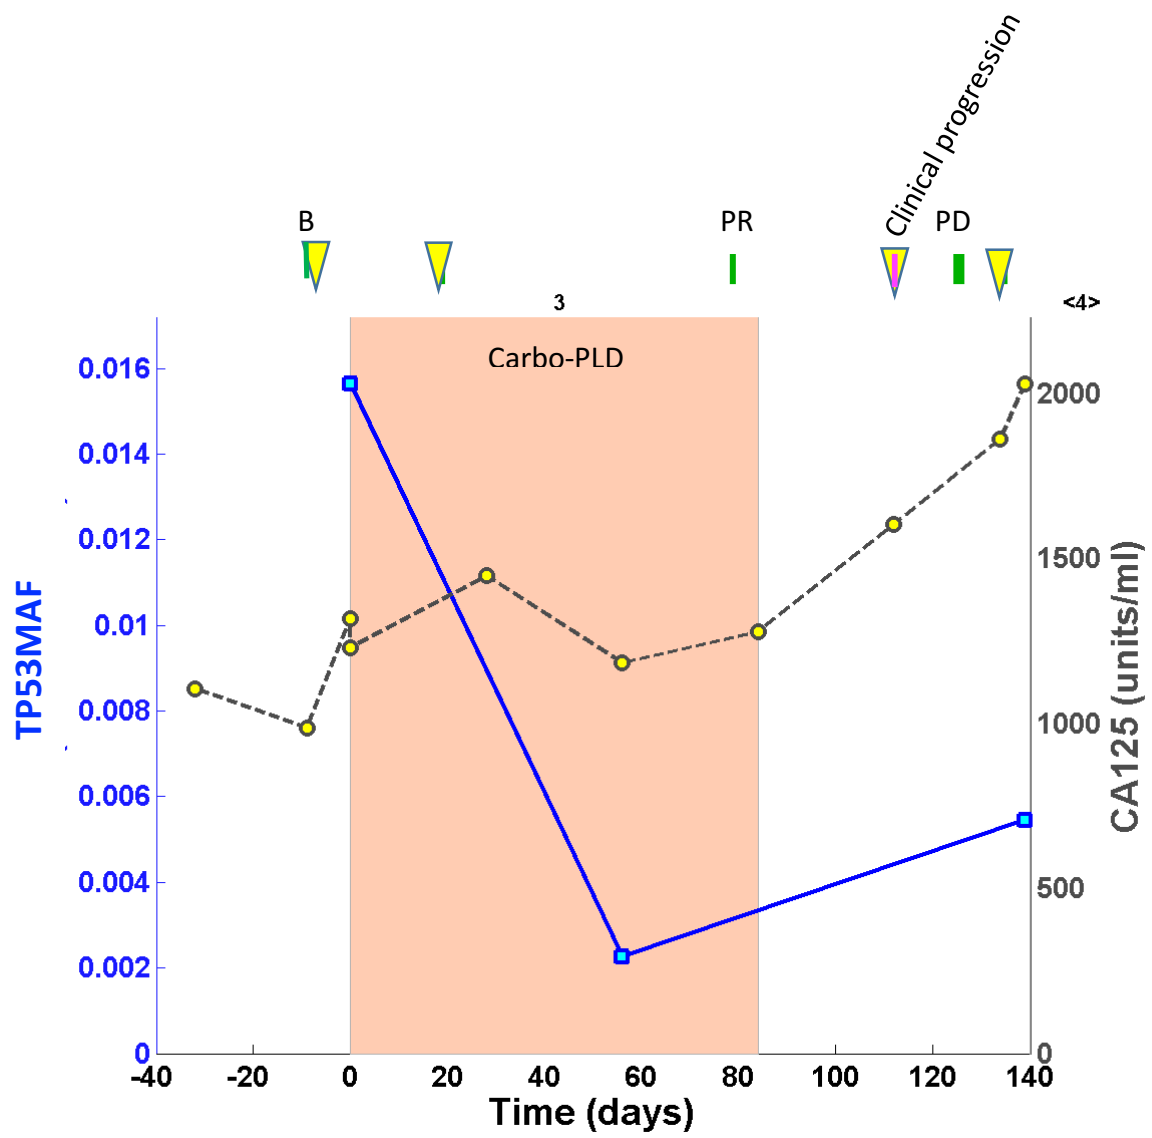

OV04-98

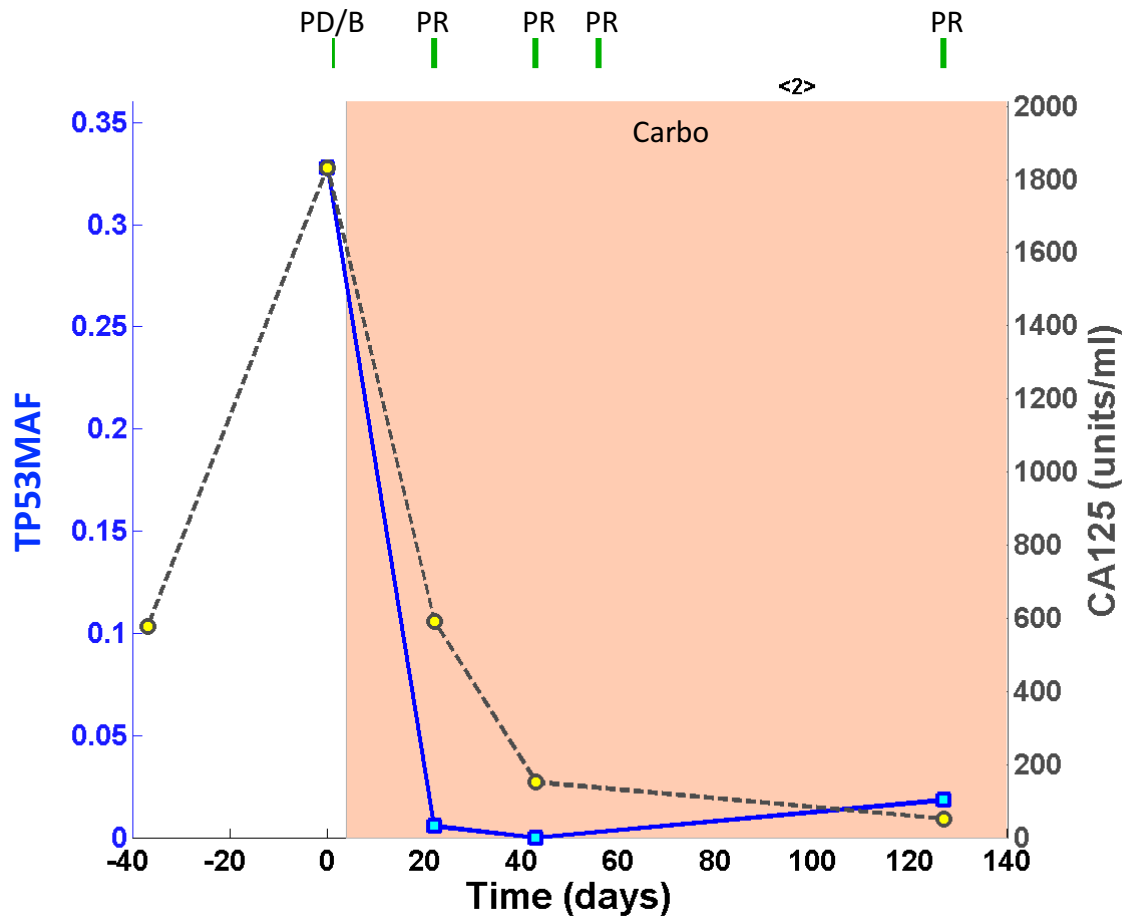

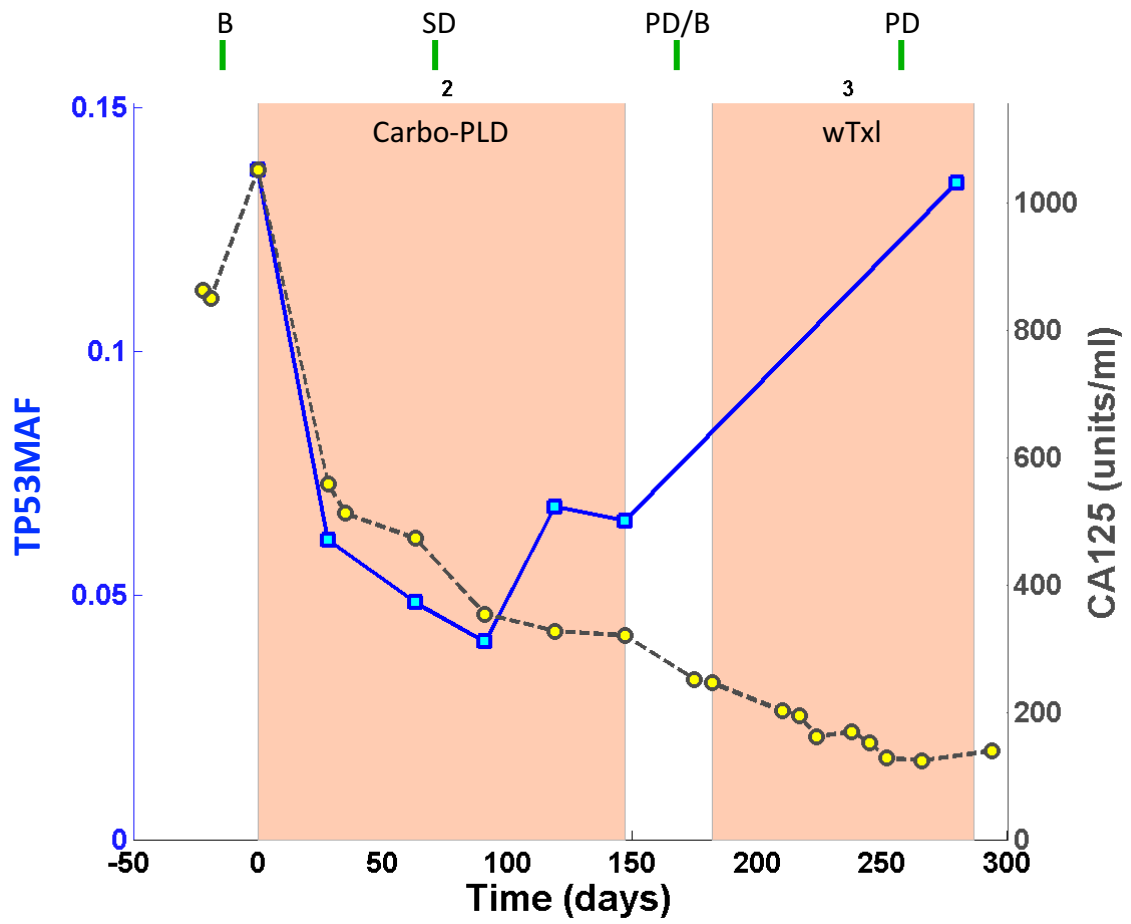

OV04-105

Stage at diagnosis: IIIC  
Residual disease: >1 cm

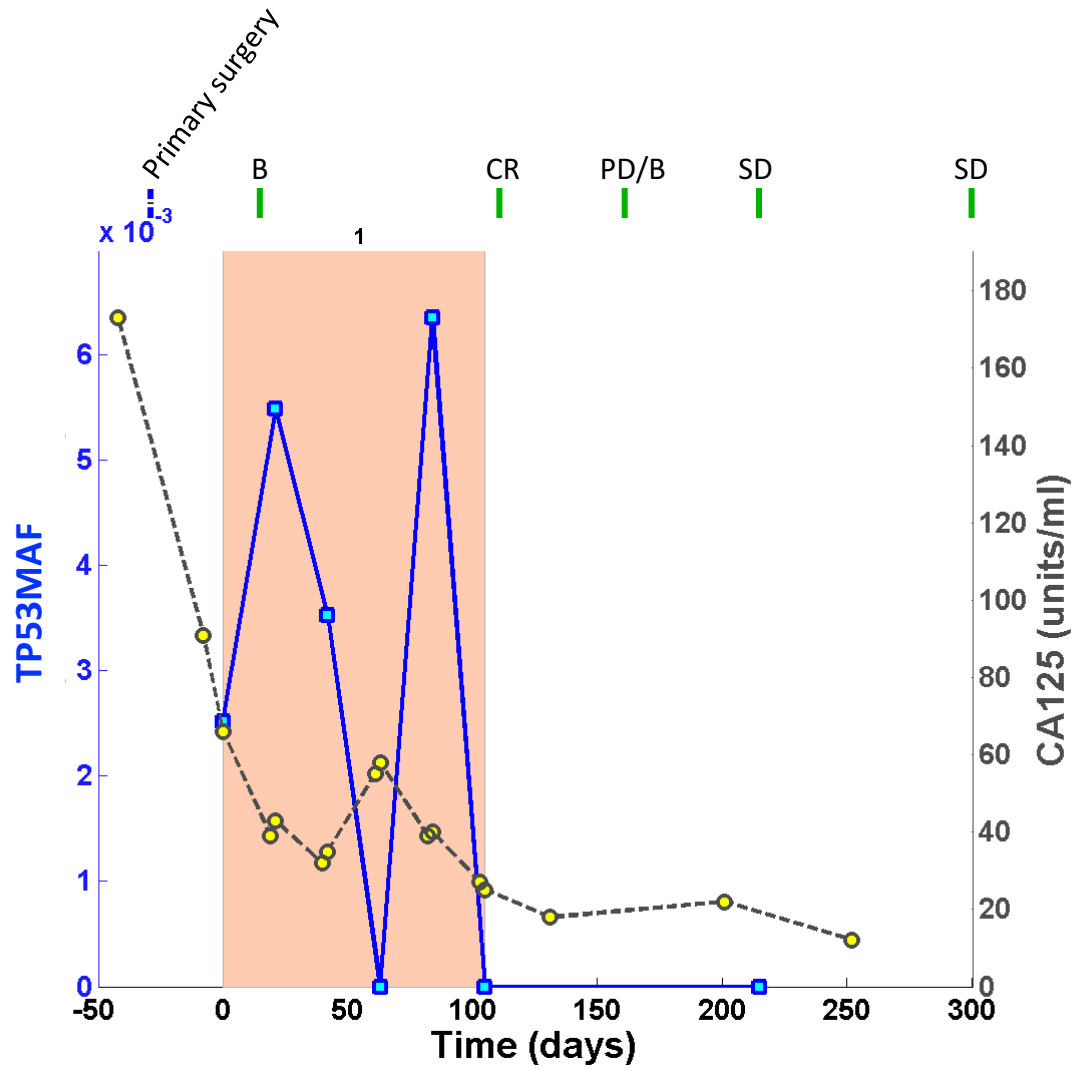

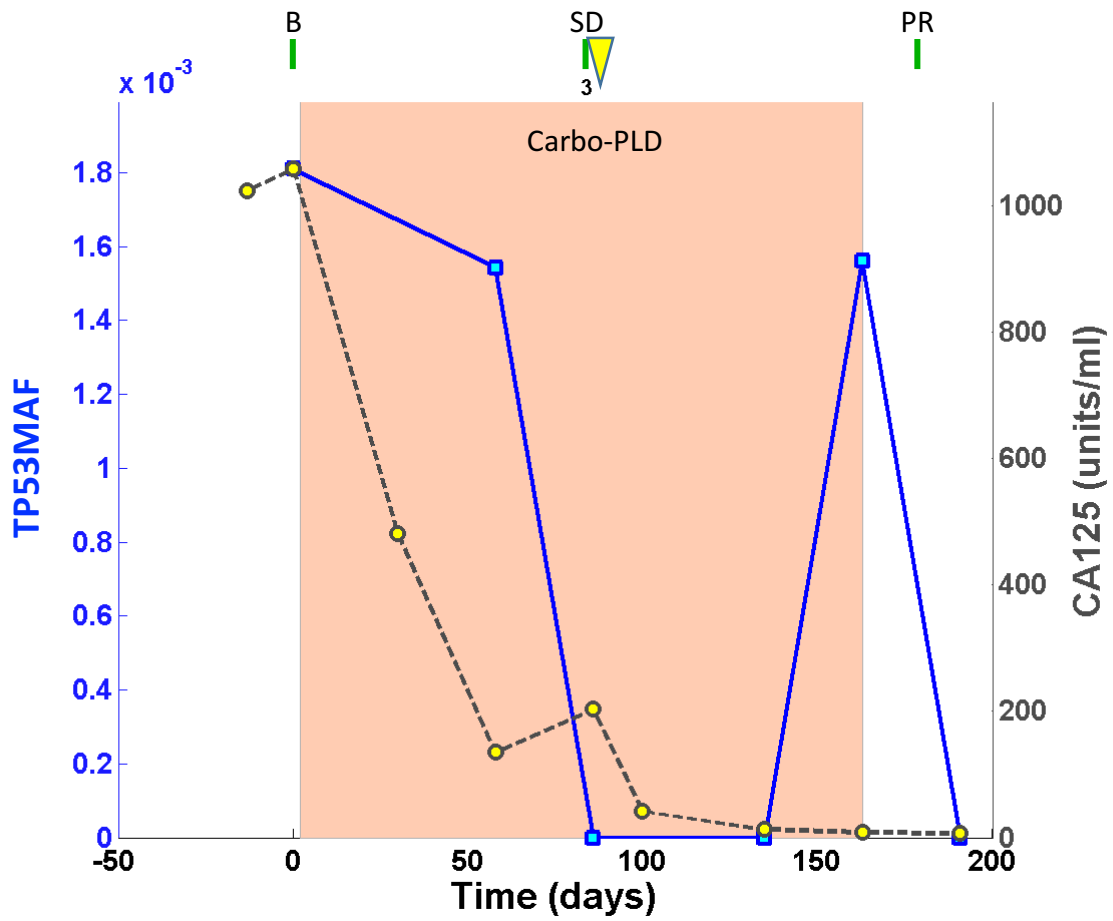

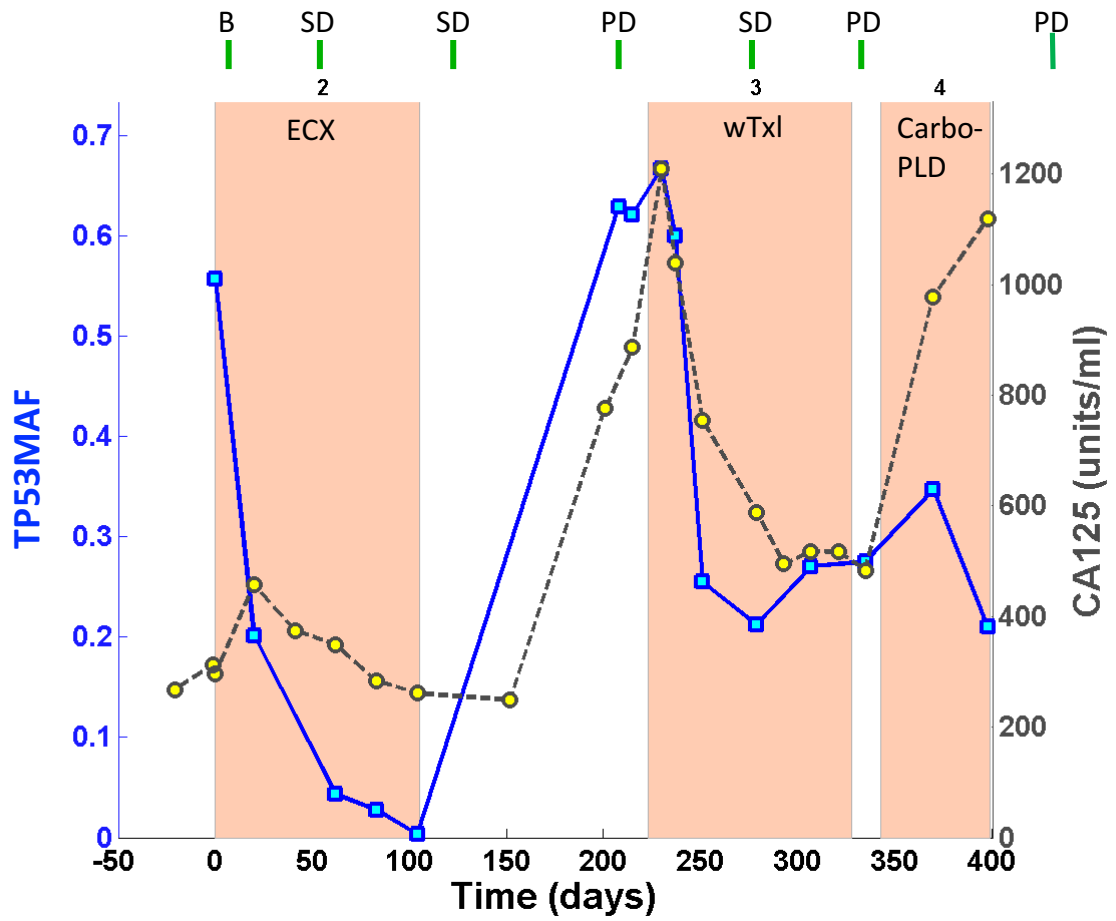

OV04-116

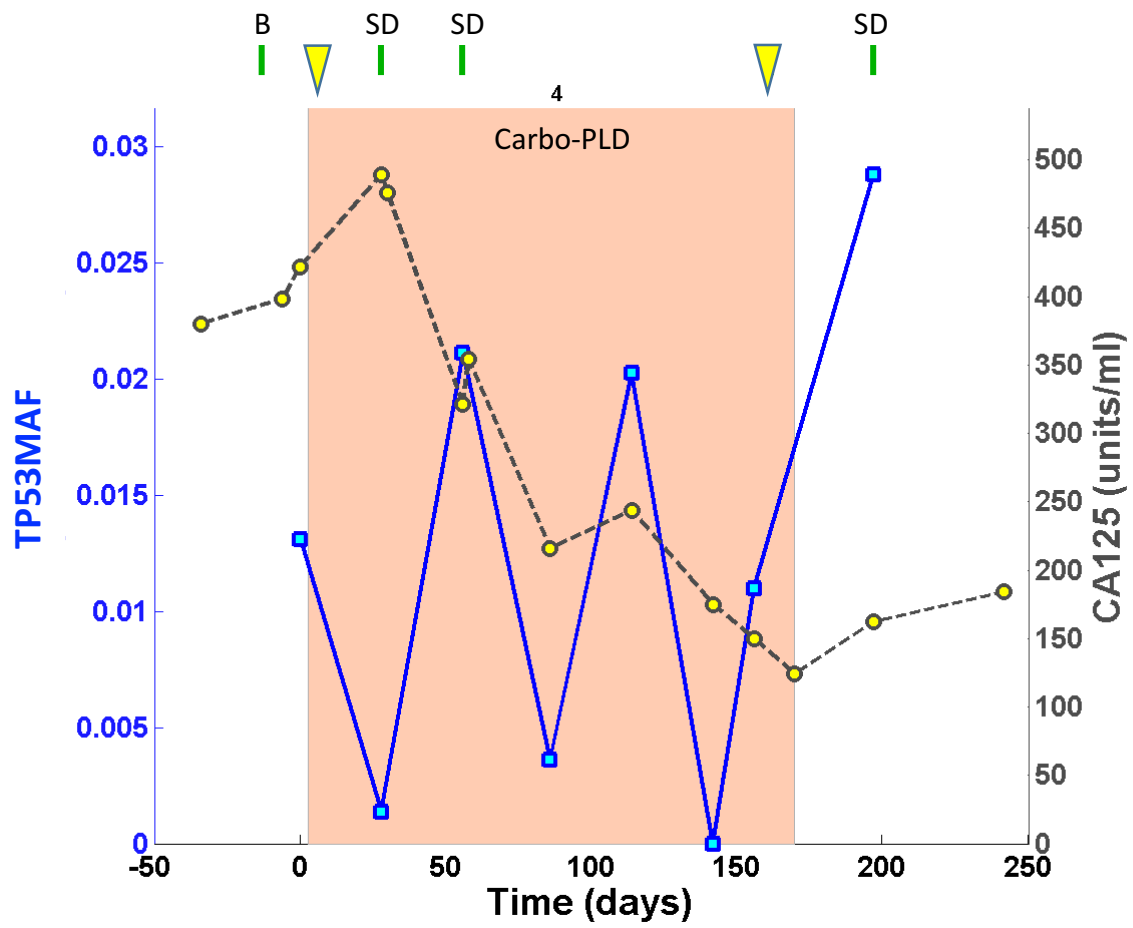

OV04-127

Stage at diagnosis: IIIC  
Residual disease: no residual

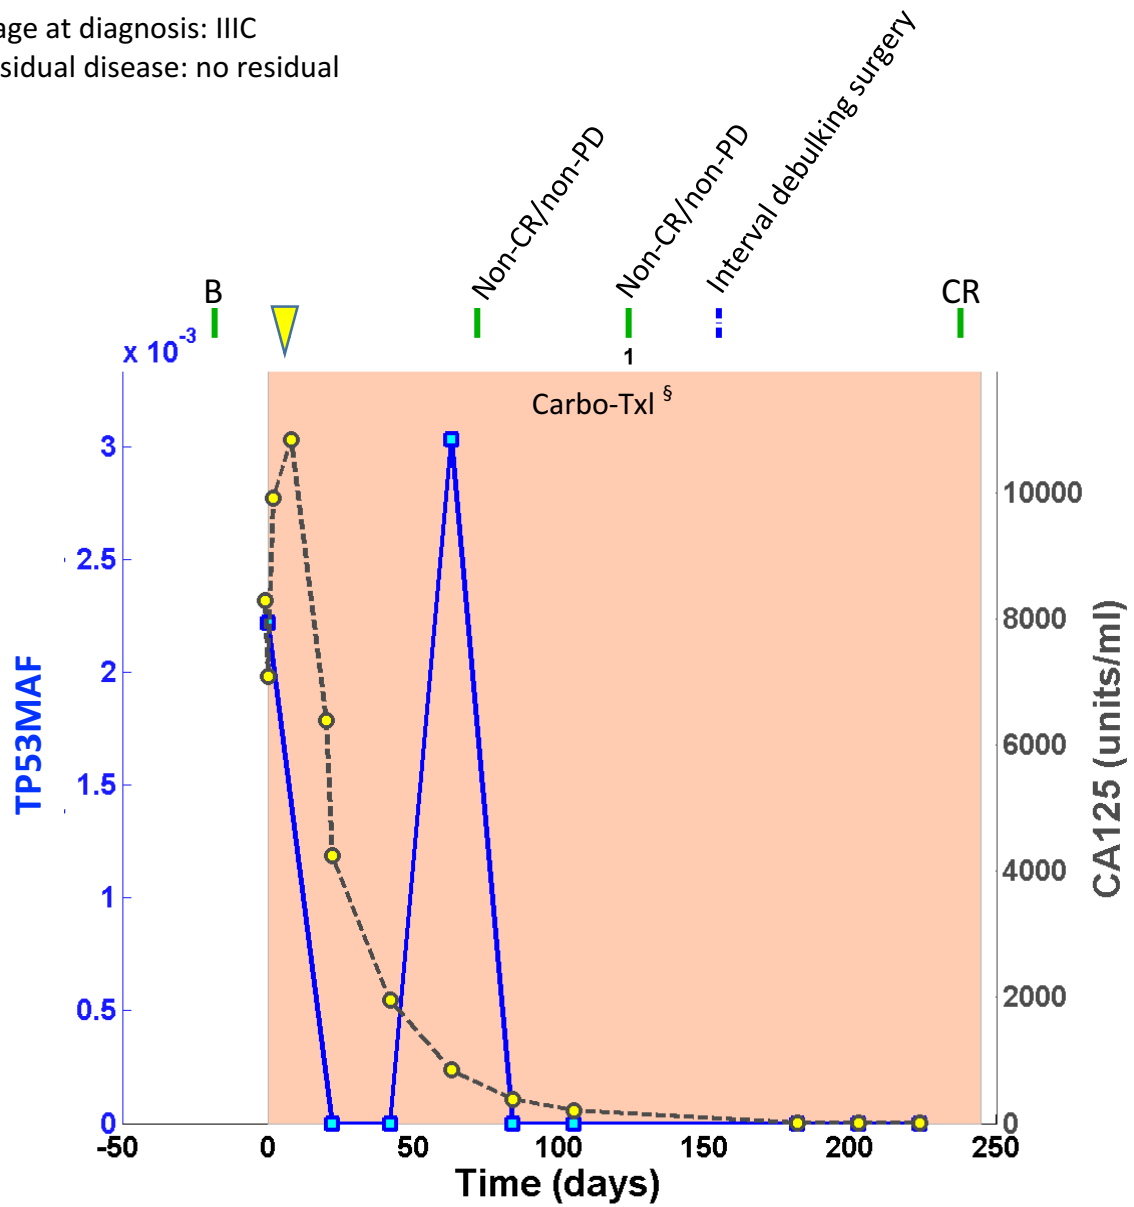

§ 1<sup>st</sup> 4 cycles carboplatin, last 5 cycles carboplatin and paclitaxel



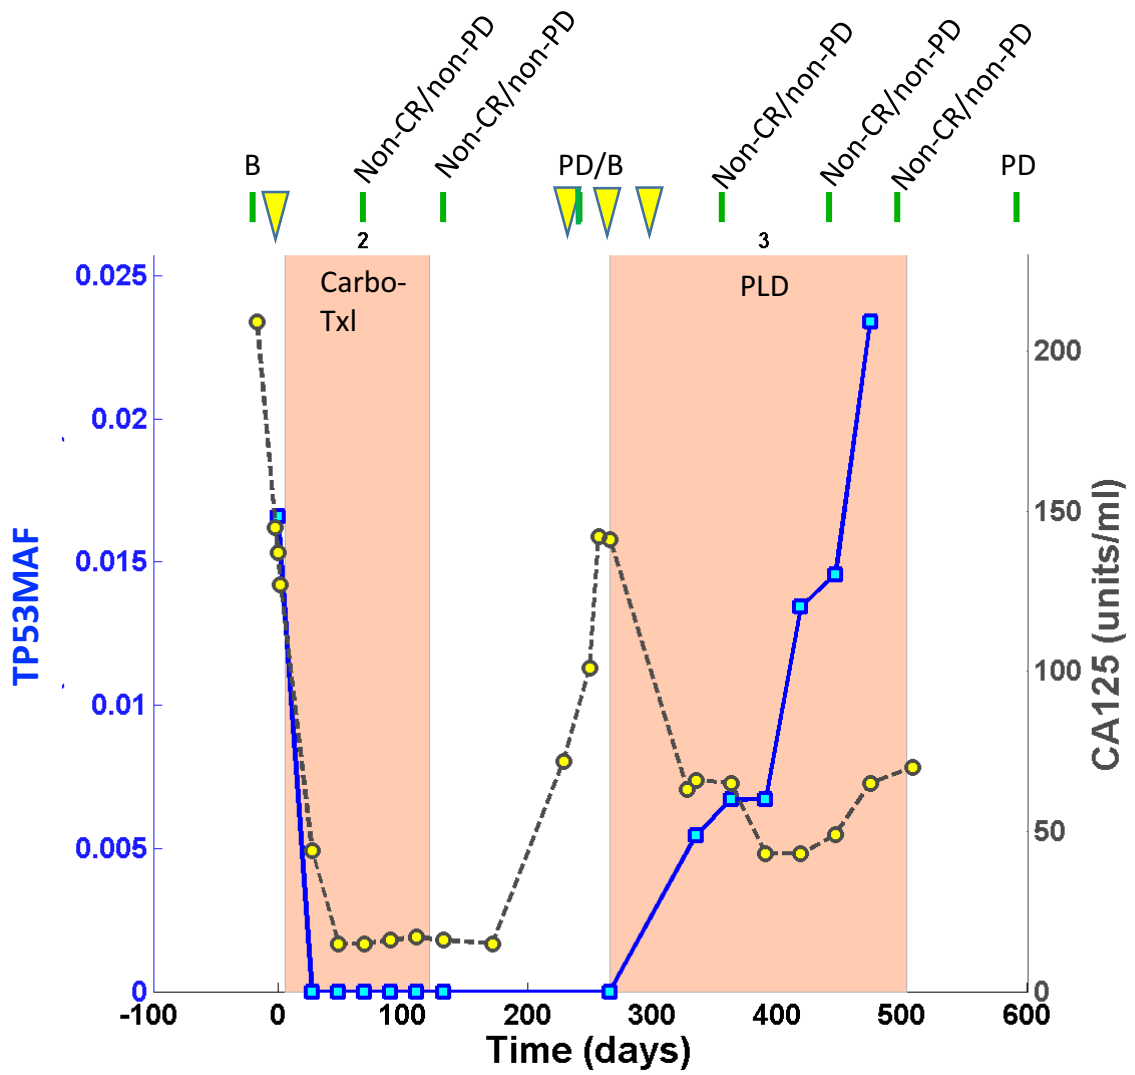

OV04-133

Stage at diagnosis: IC  
Residual disease: no residual

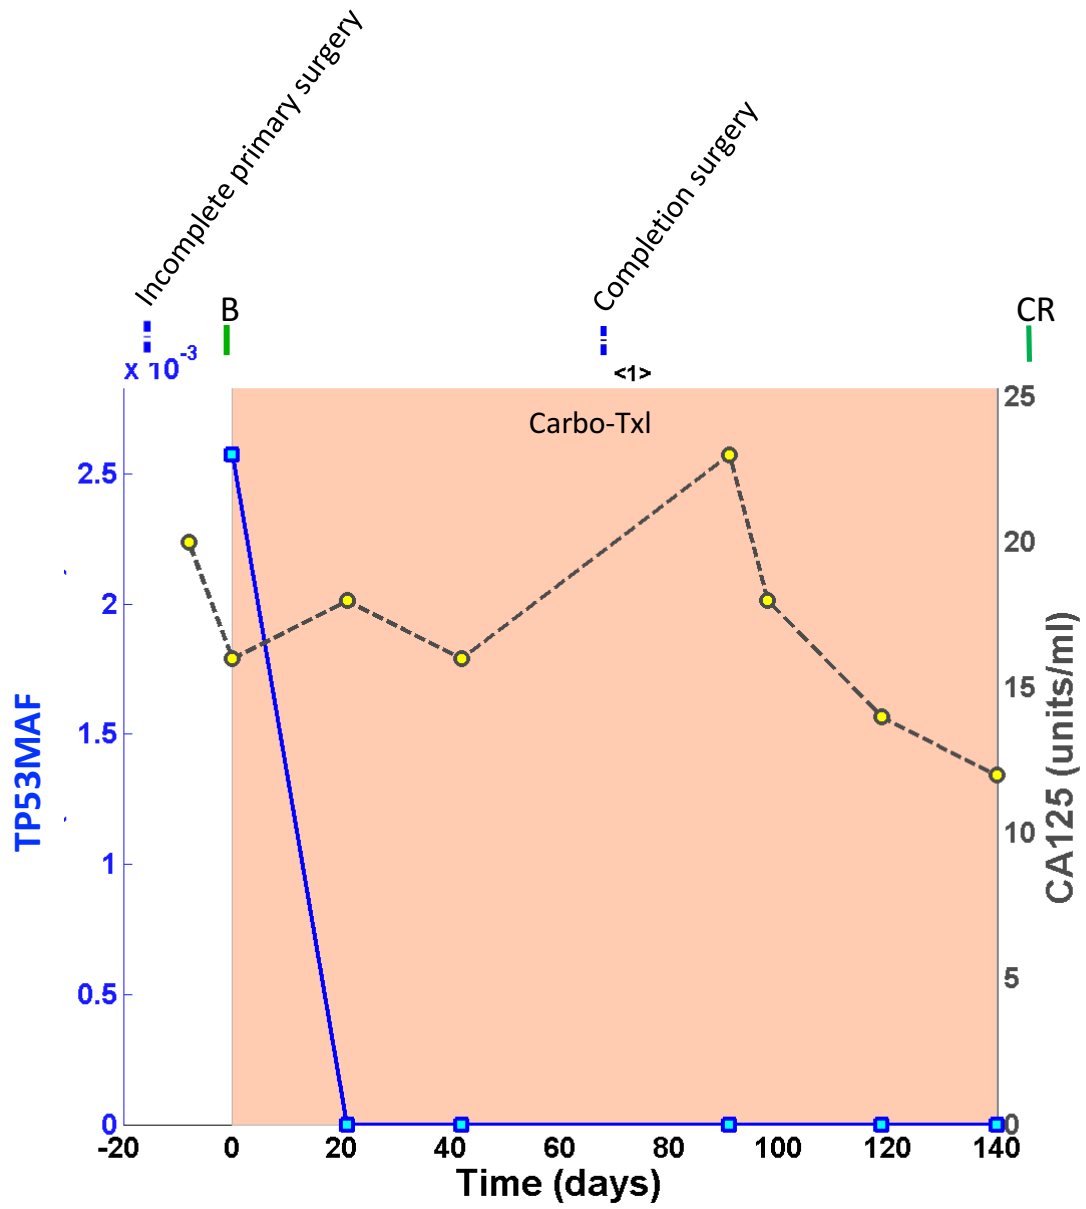

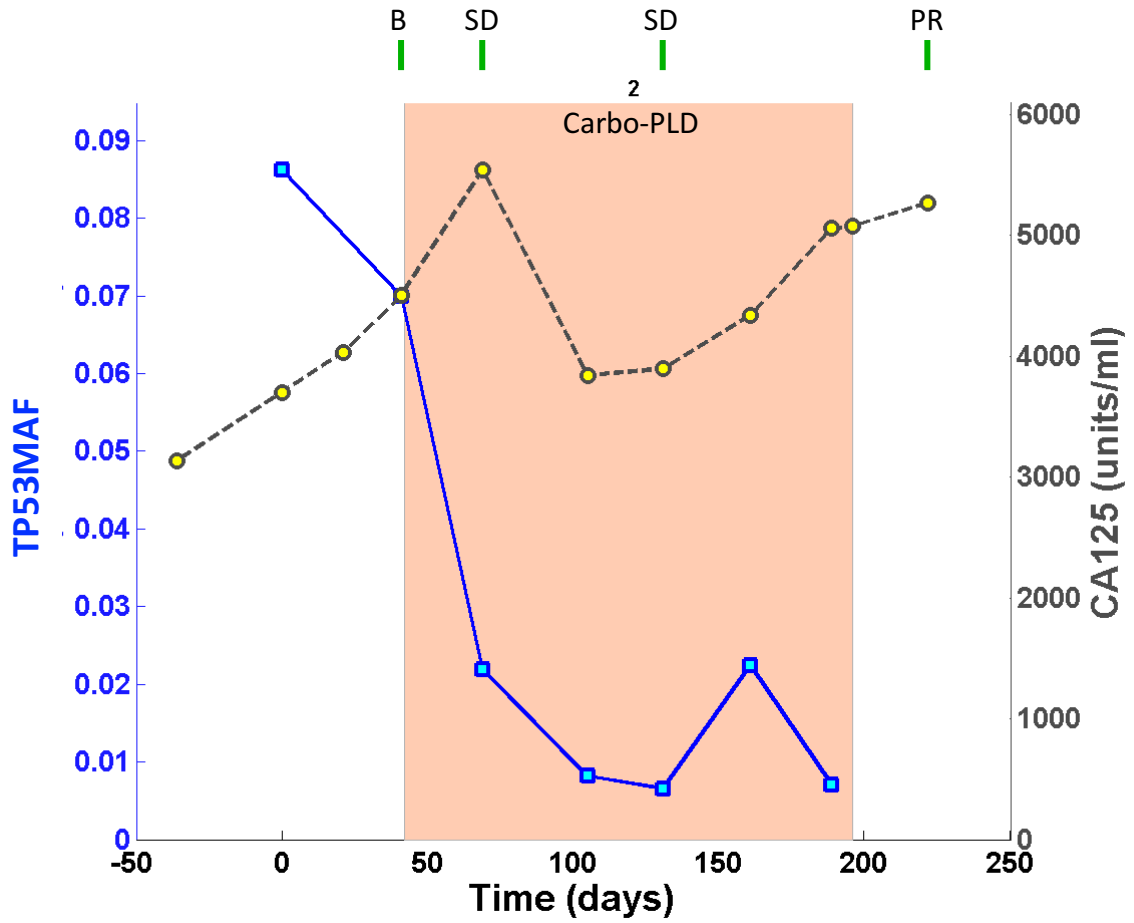

OV04-142

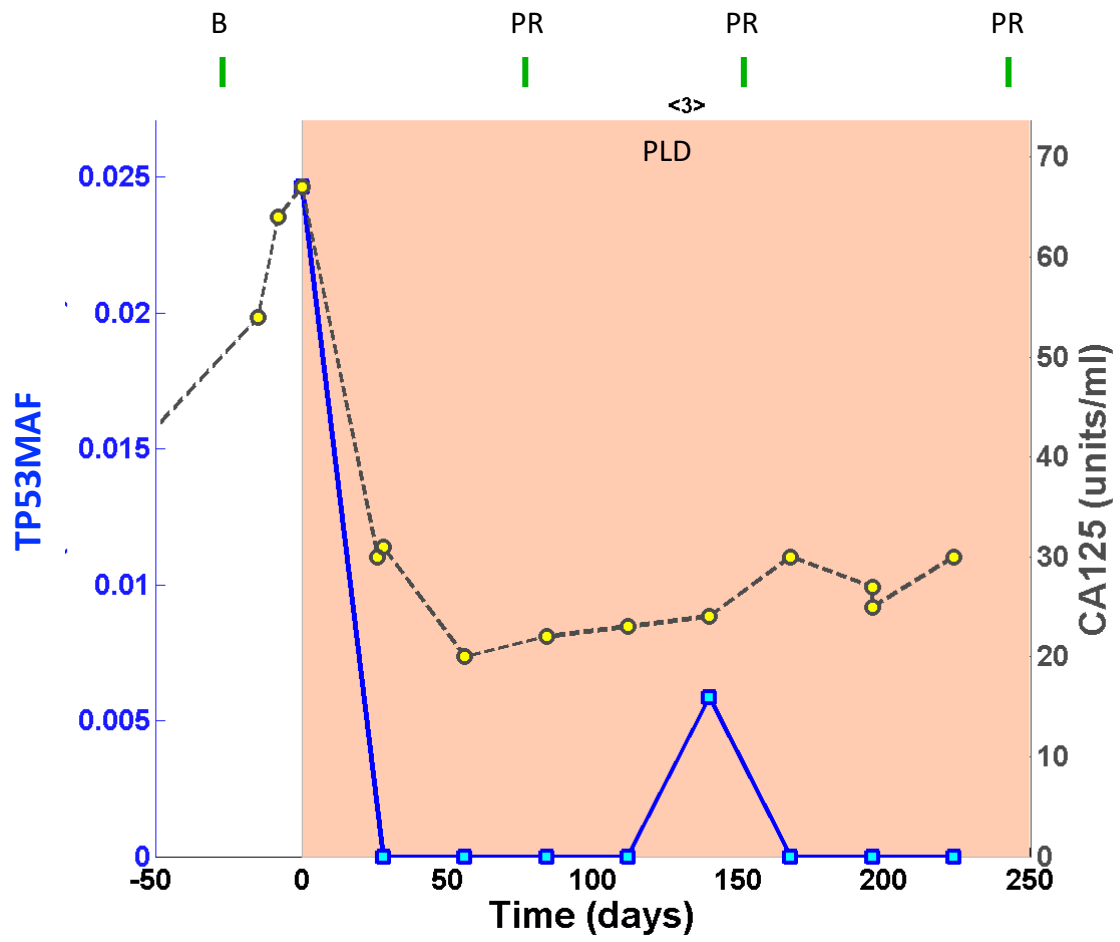

OV04-144

Stage at diagnosis: IIIC  
Residual disease: <1 cm

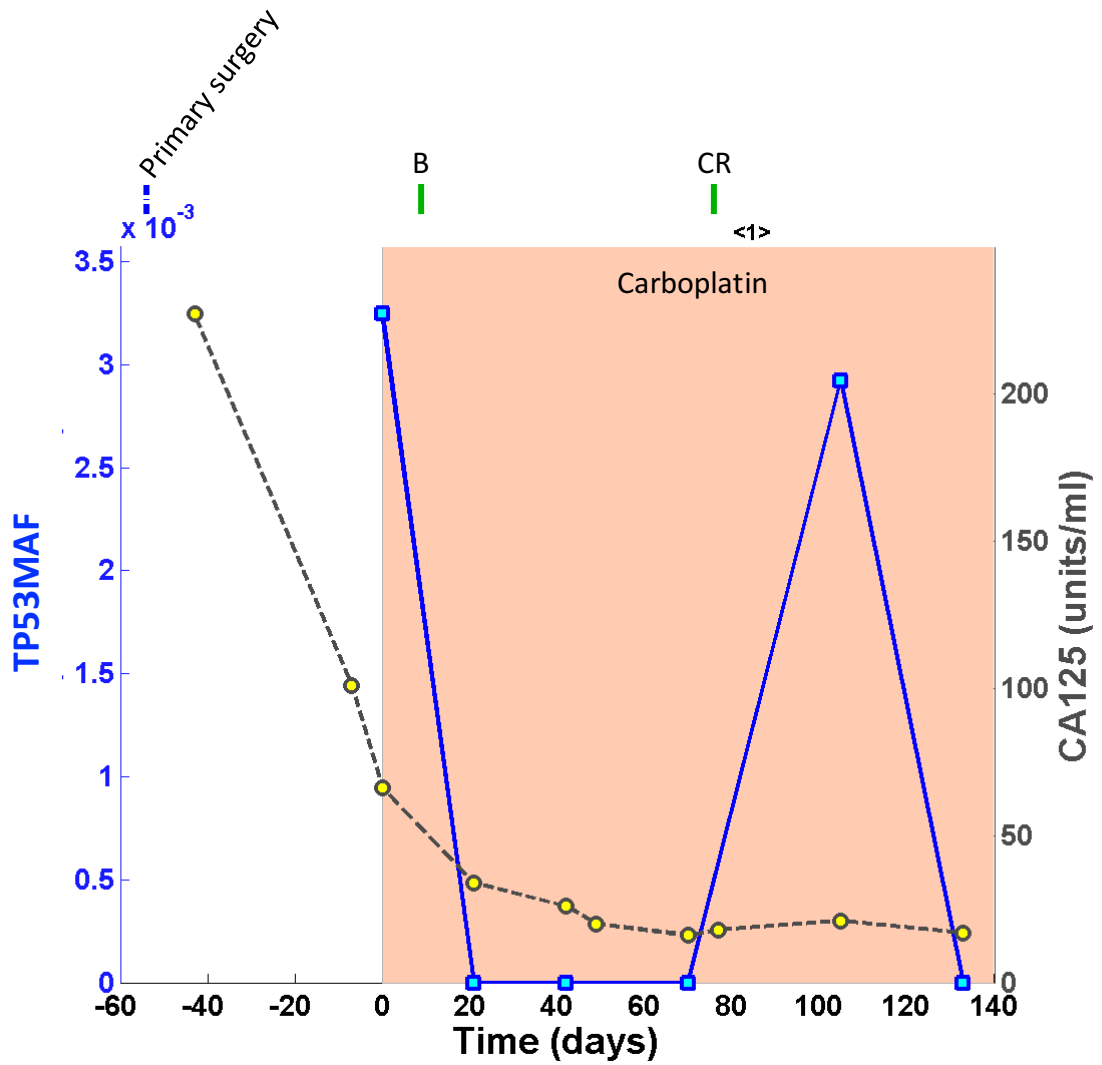

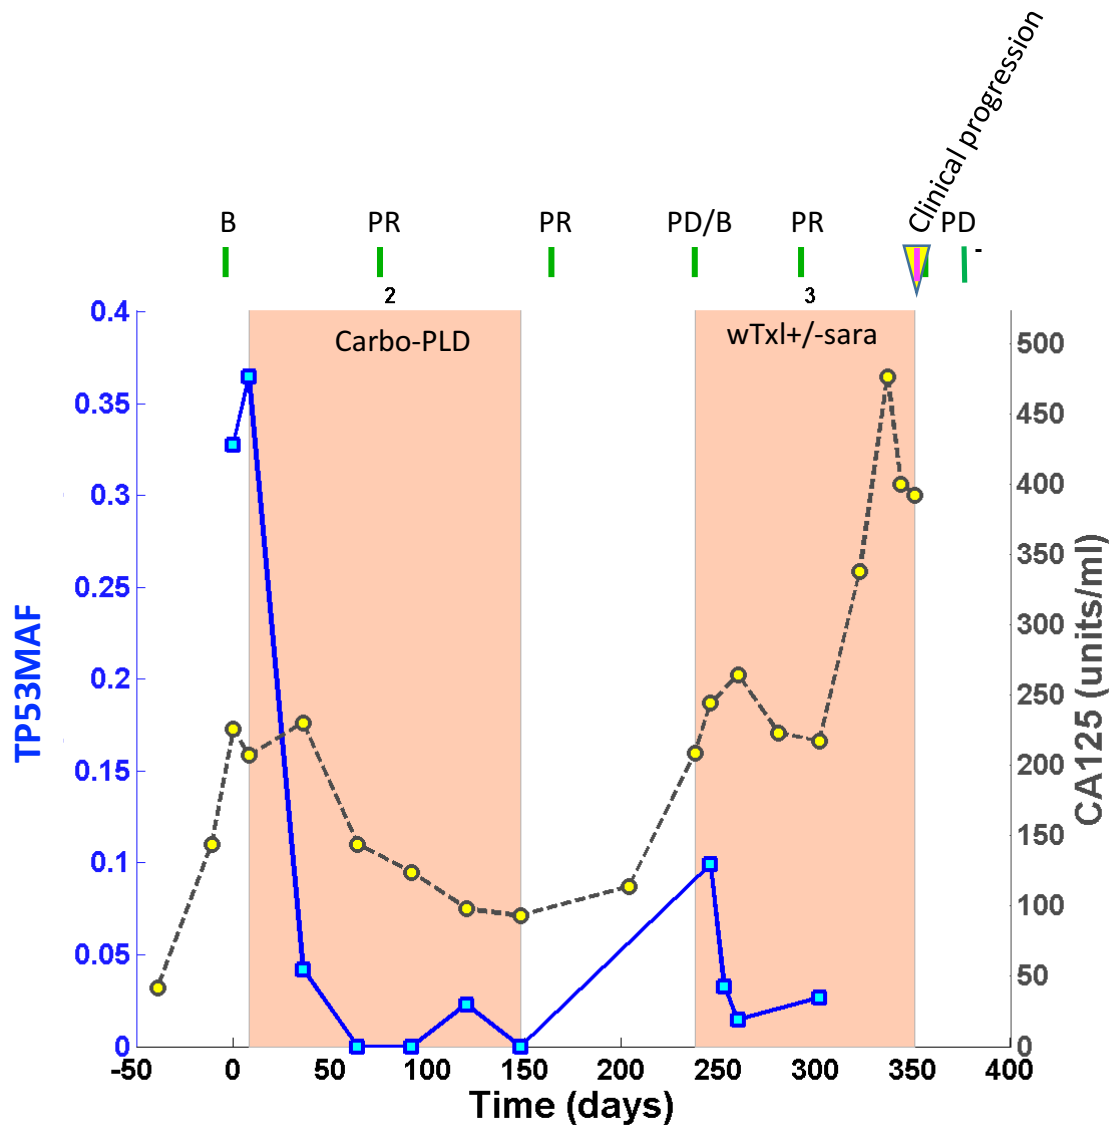

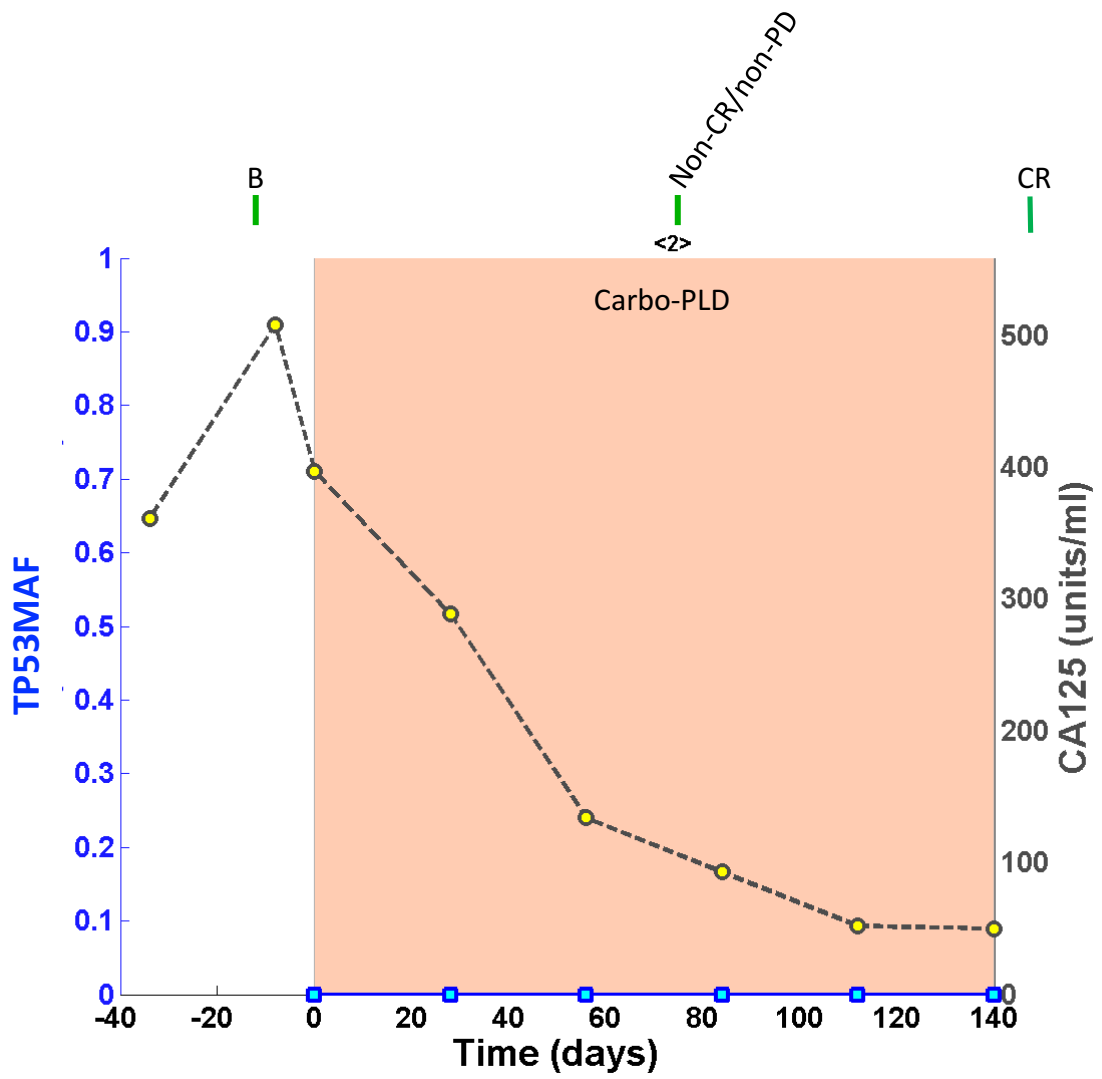

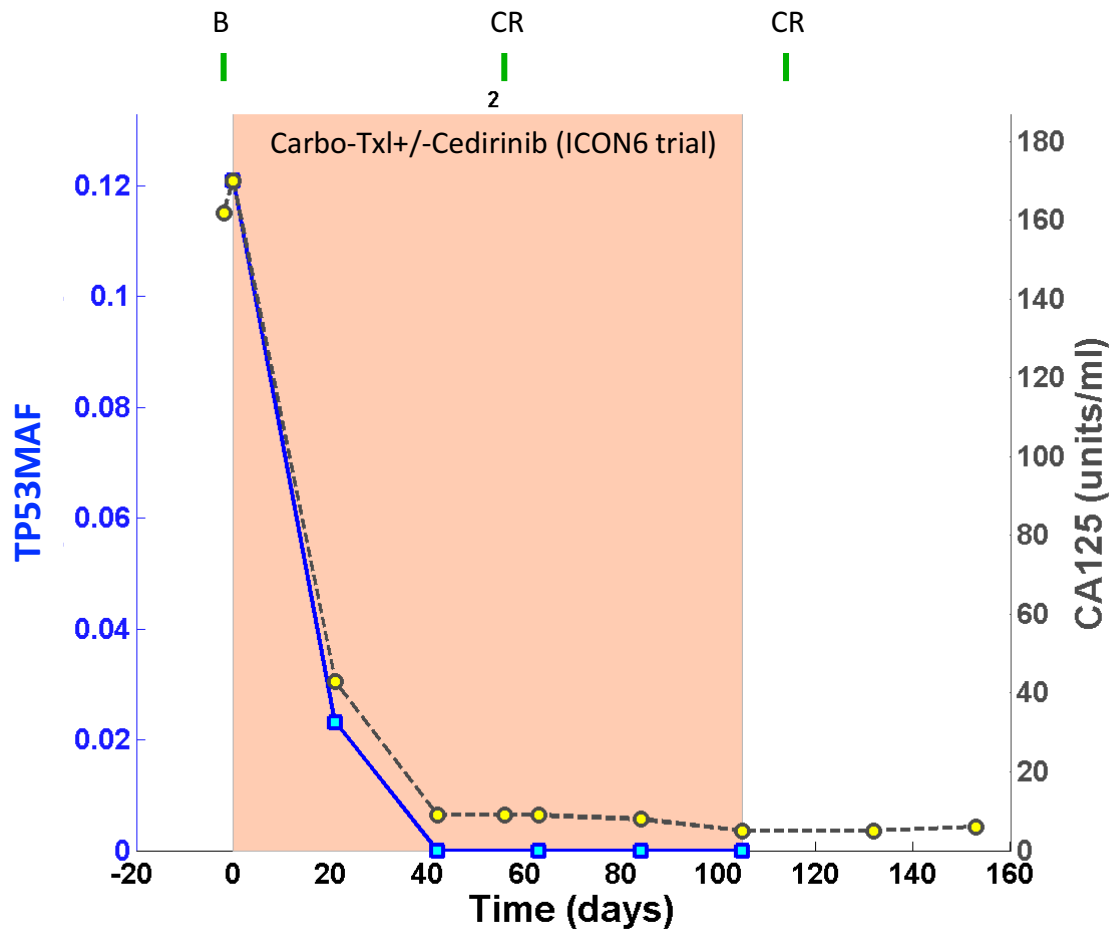



OV04-200

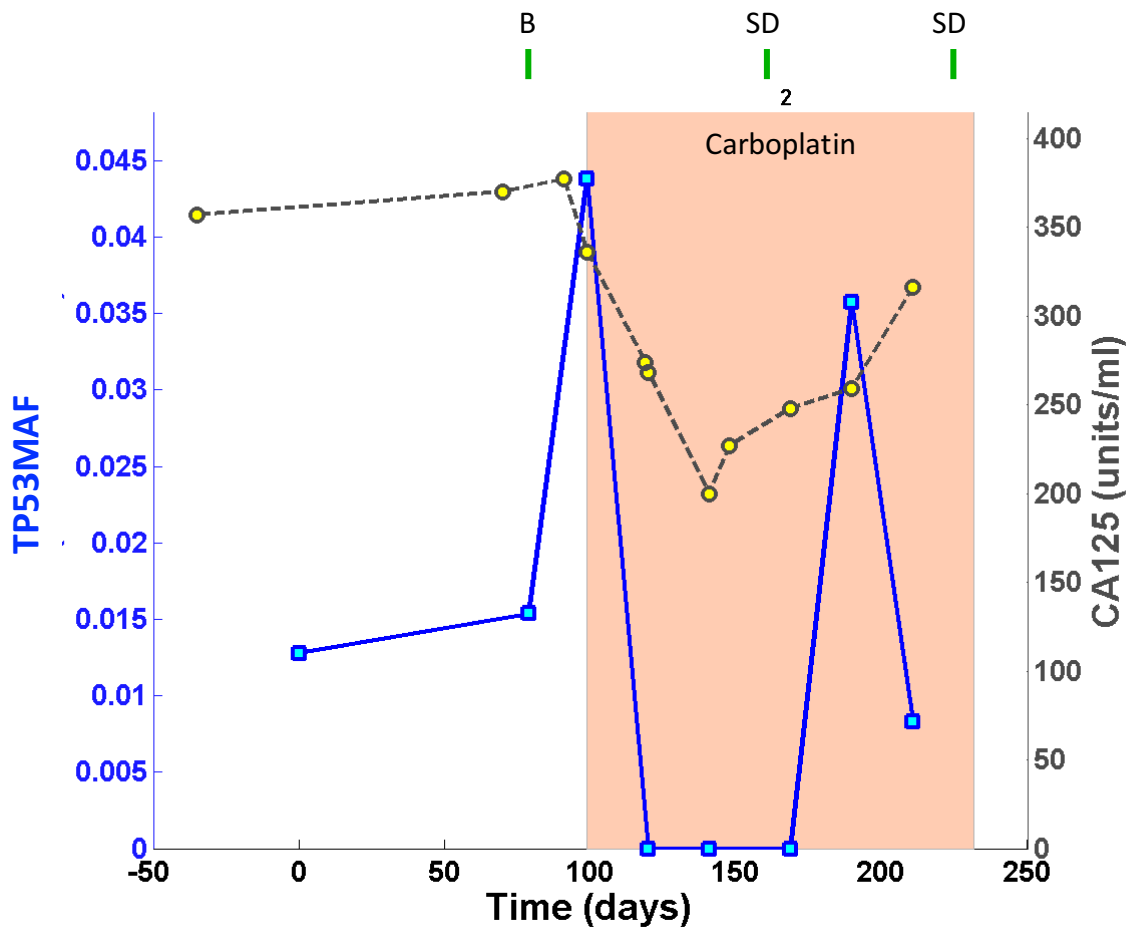

Supplement: pmed.1002198.s007.pdf [file pmed.1002198.s007.pdf]
