# Supplementary material for: Exploratory Analysis of TP53 Mutations in Circulating Tumour DNA as Biomarkers of Treatment Response for Patients with Relapsed High-Grade Serous Ovarian Carcinoma: A Retrospective Study
Source: PubMed Central journal article supplement (PMC5172526; doi:10.1371/journal.pmed.1002198), 2016-12-20

**S3 Table. Context of ctDNA samples collected on study relative to chemotherapy cycle.**  
**A. Samples from chemotherapy at relapse. B. Samples collected during 1st line treatment**

**A.**

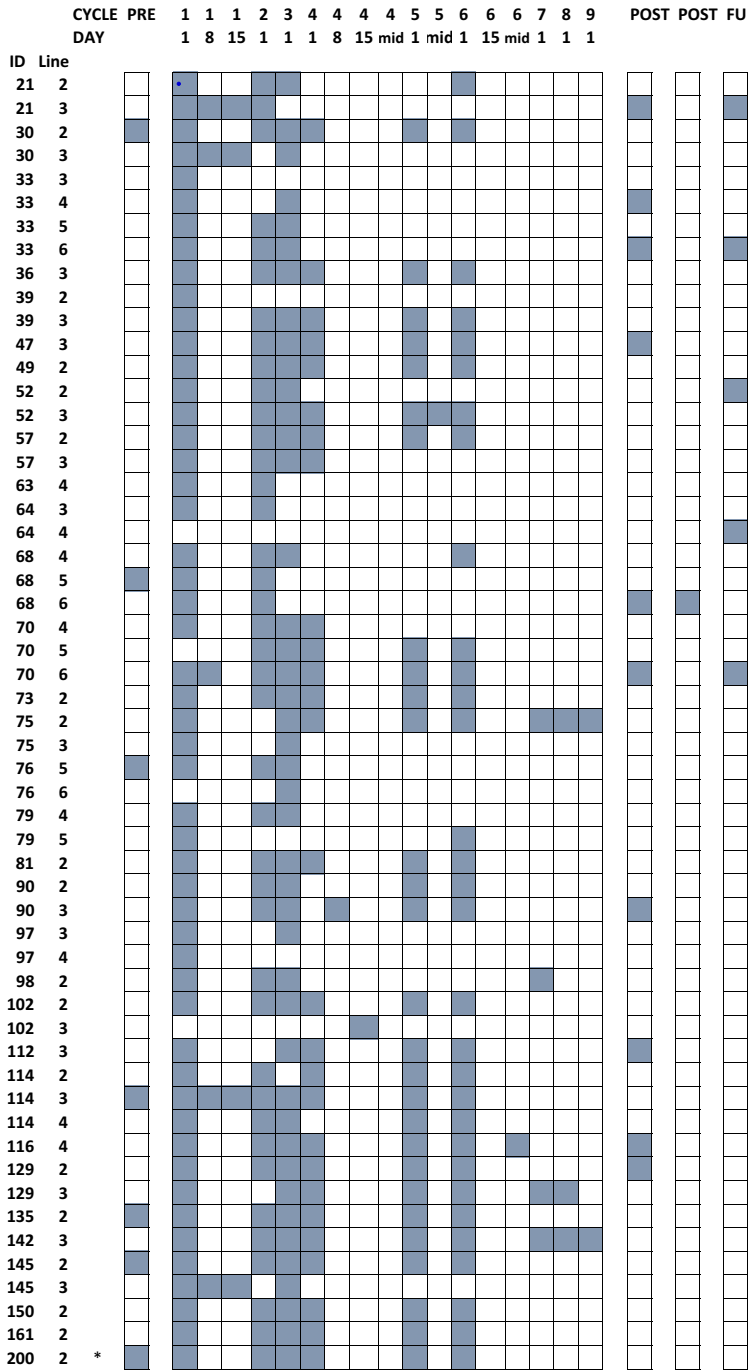

\* 1 follow up sample post primary chemotherapy not marked

**B.**

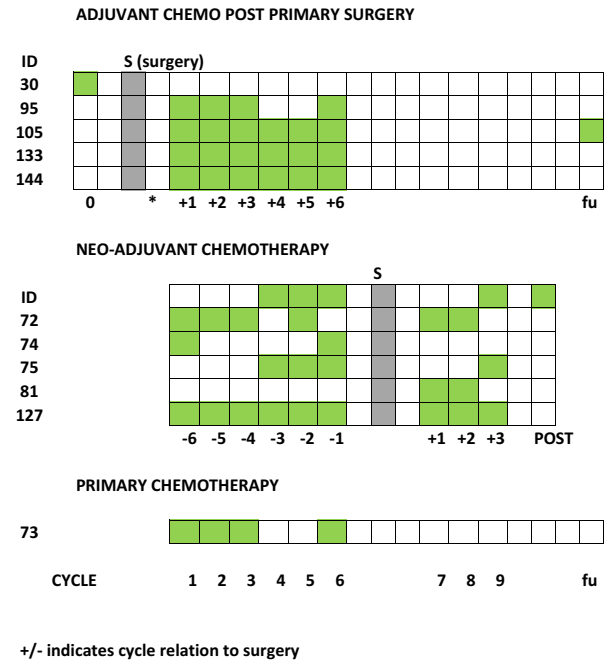

Supplement: pmed.1002198.s013.pdf [file pmed.1002198.s013.pdf]
